# Supplementary material for: Identification of Bari Transposons in 23 Sequenced Drosophila Genomes Reveals Novel Structural Variants, MITEs and Horizontal Transfer
Source: PubMed Central journal article supplement (PMC4877112; doi:10.1371/journal.pone.0156014), 2016-05-23

# D. ananassae

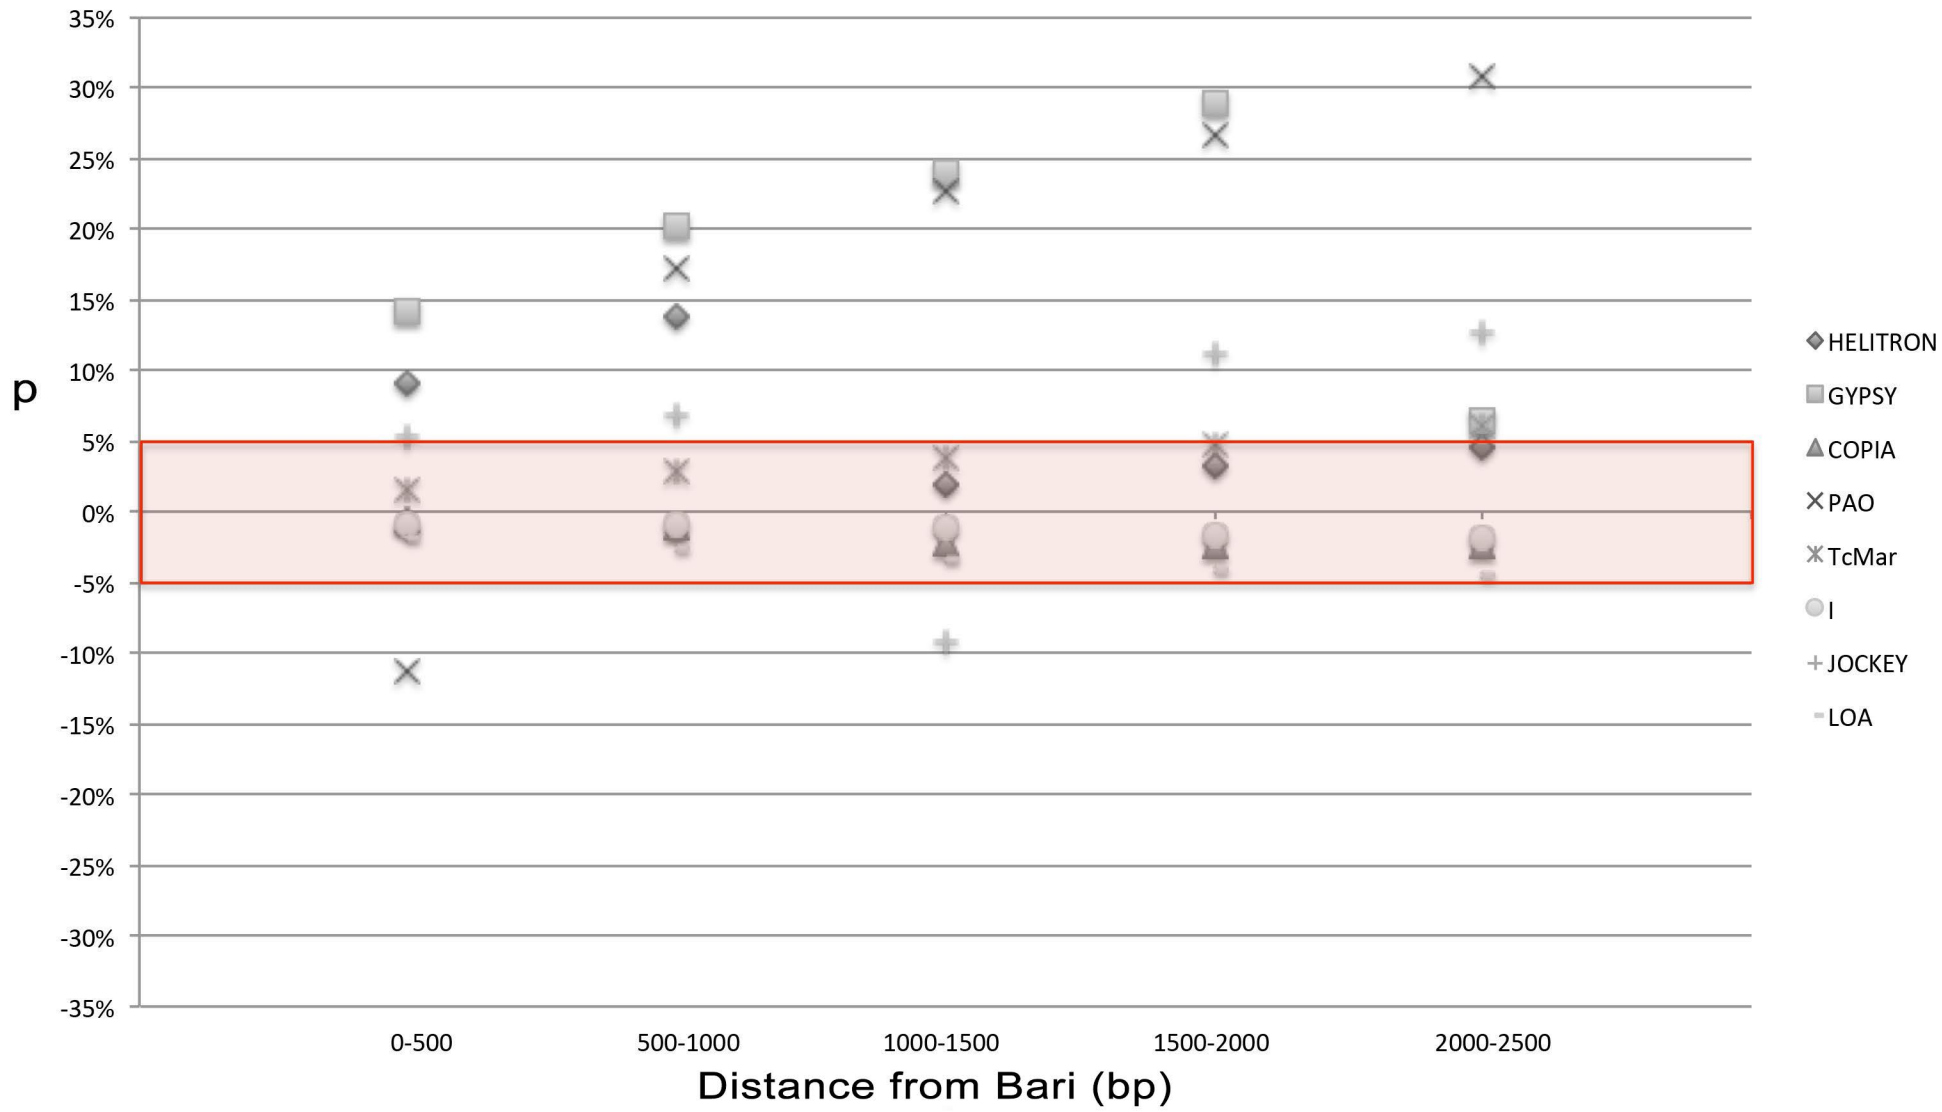

# D. biarmipes

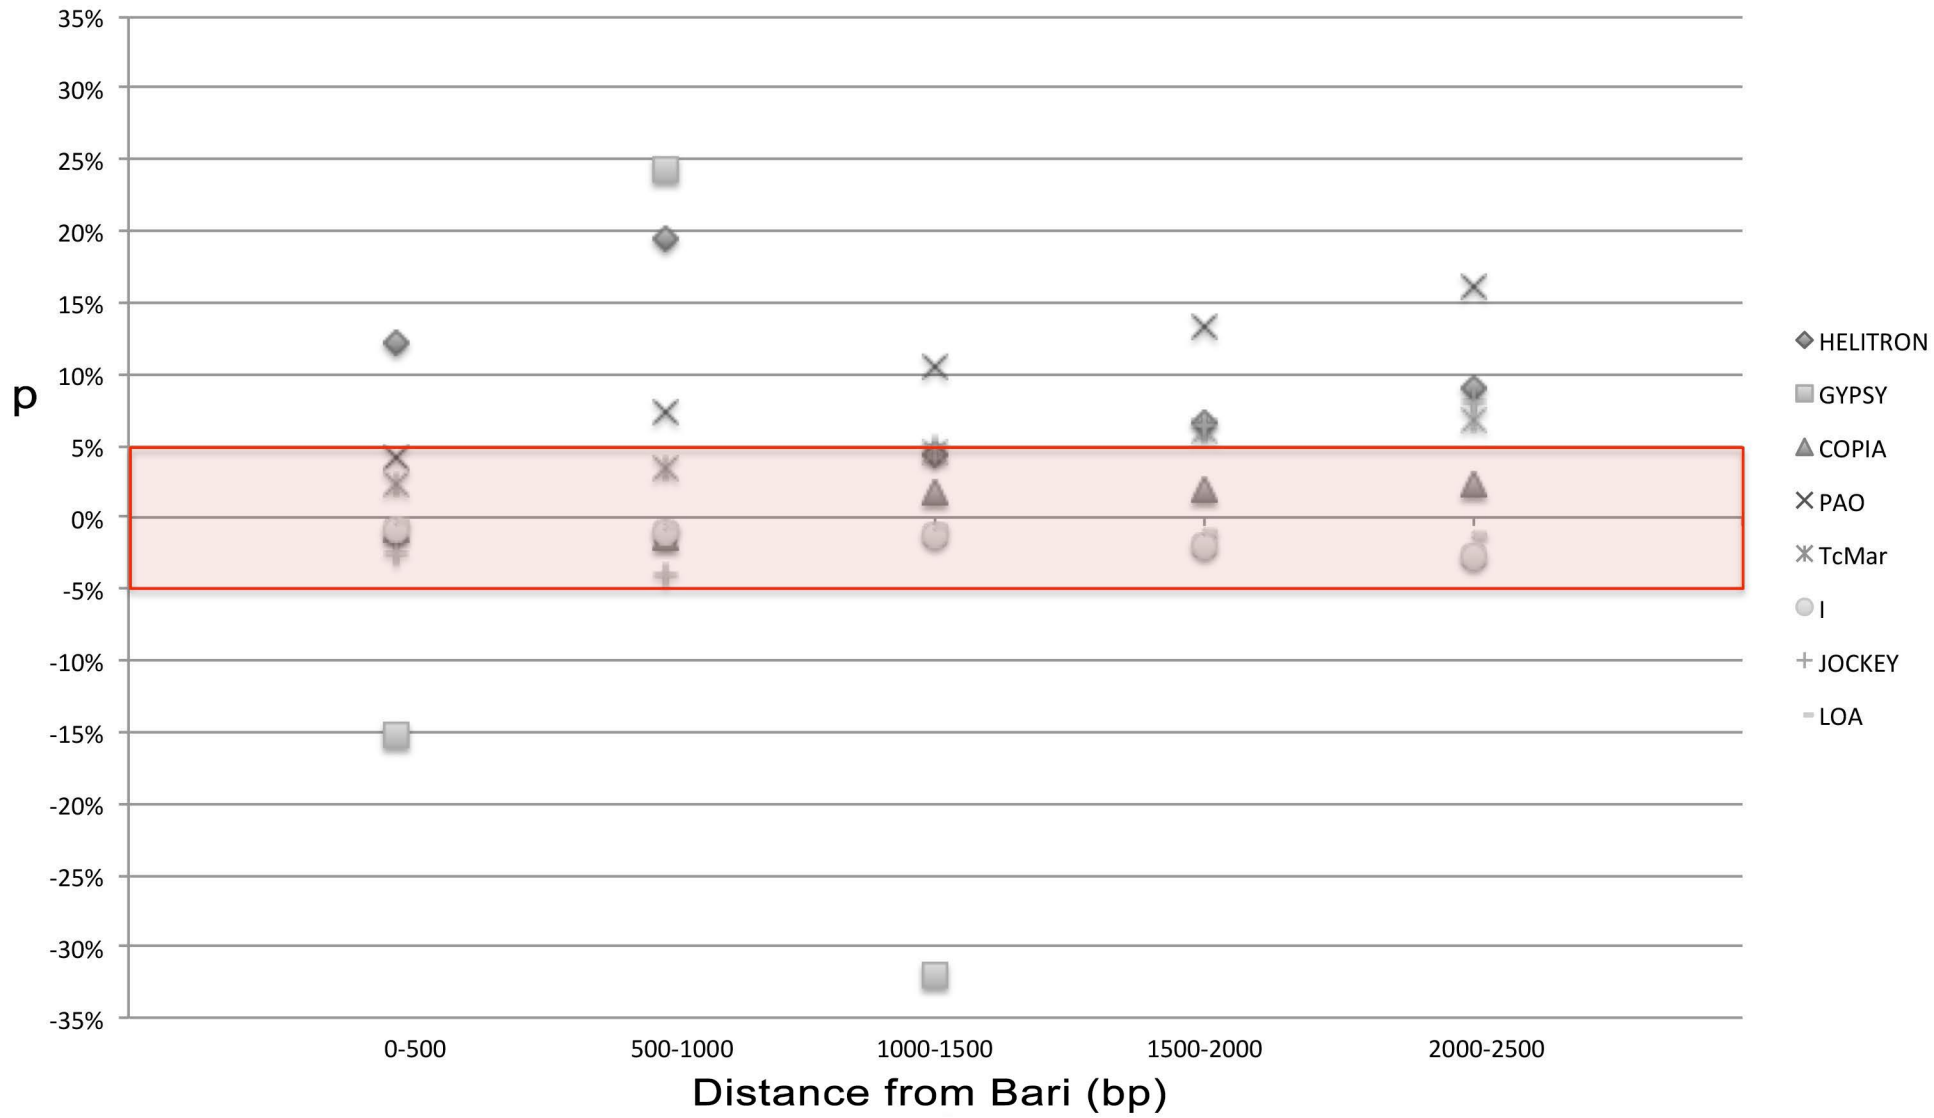

# D. erecta

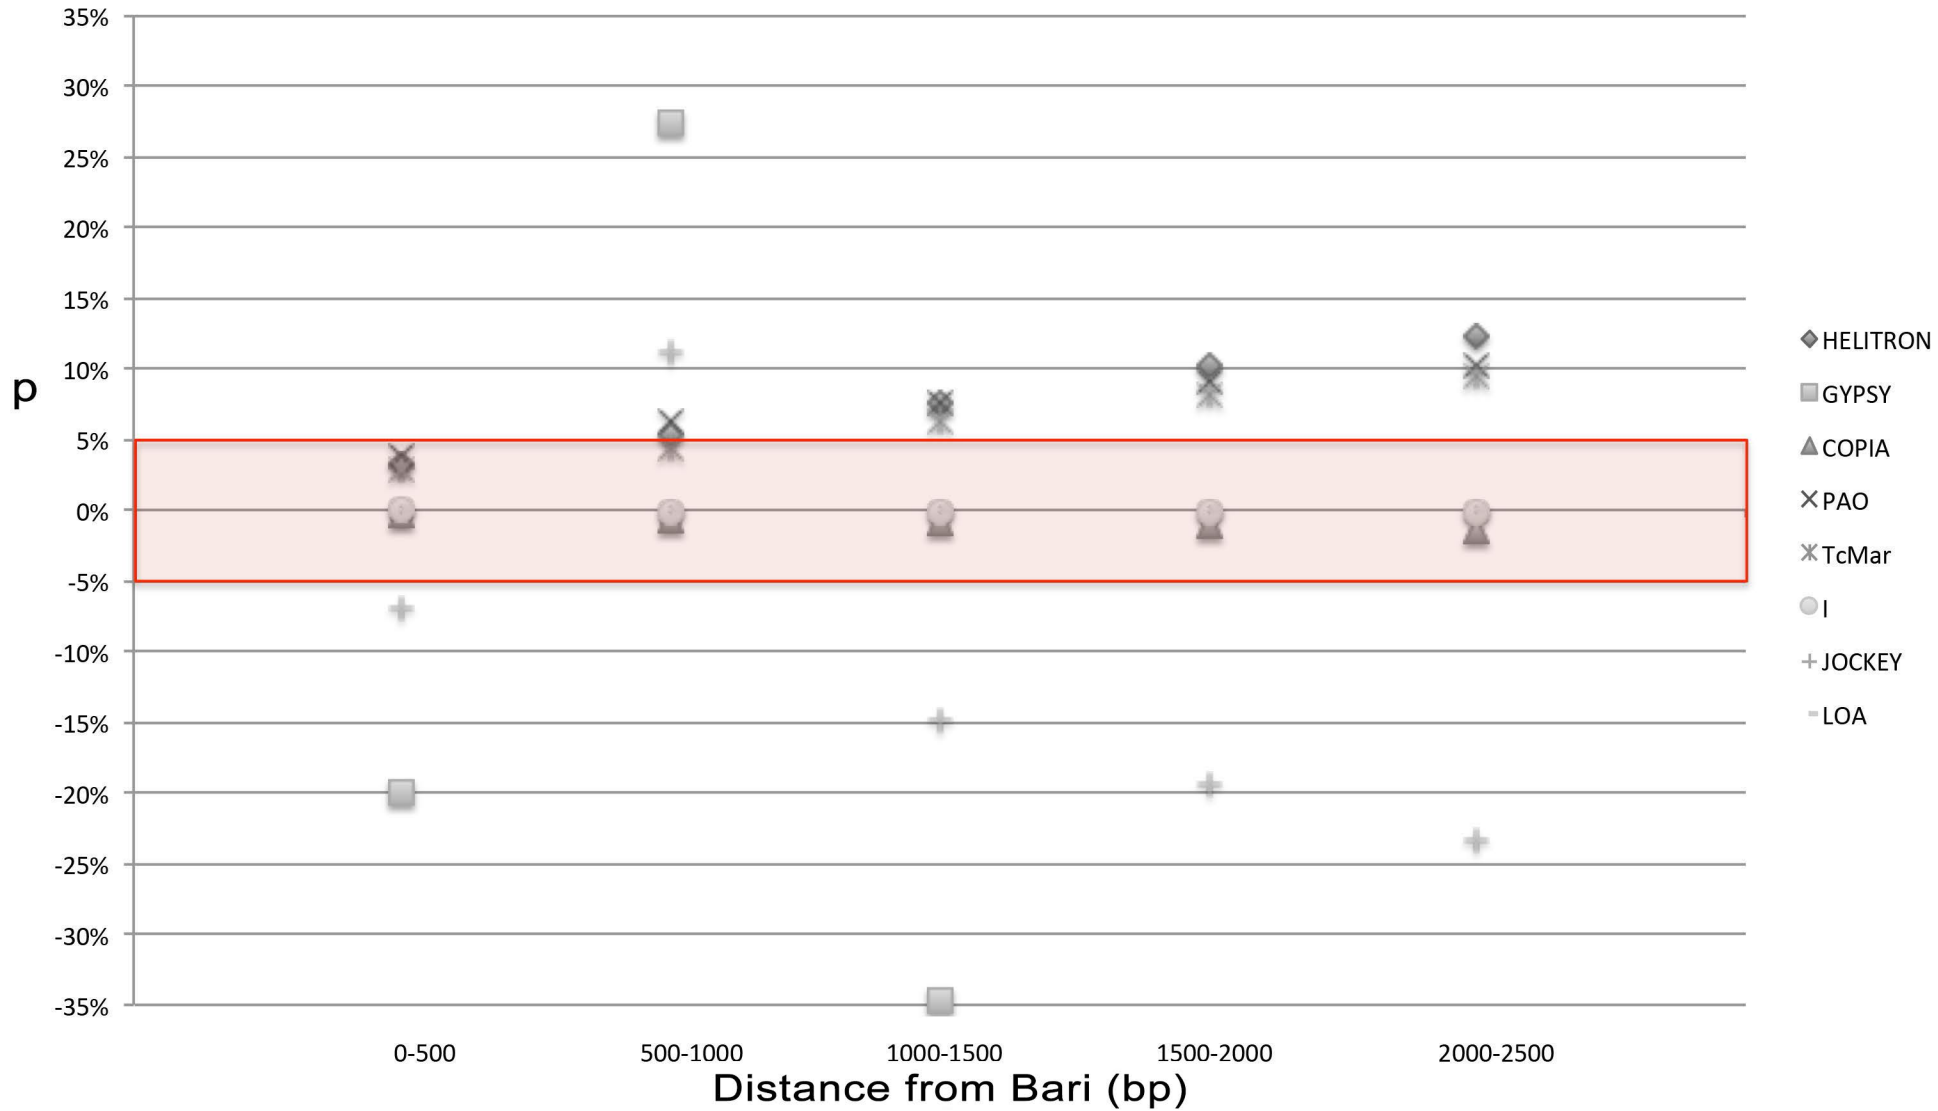

# D. kikkawai

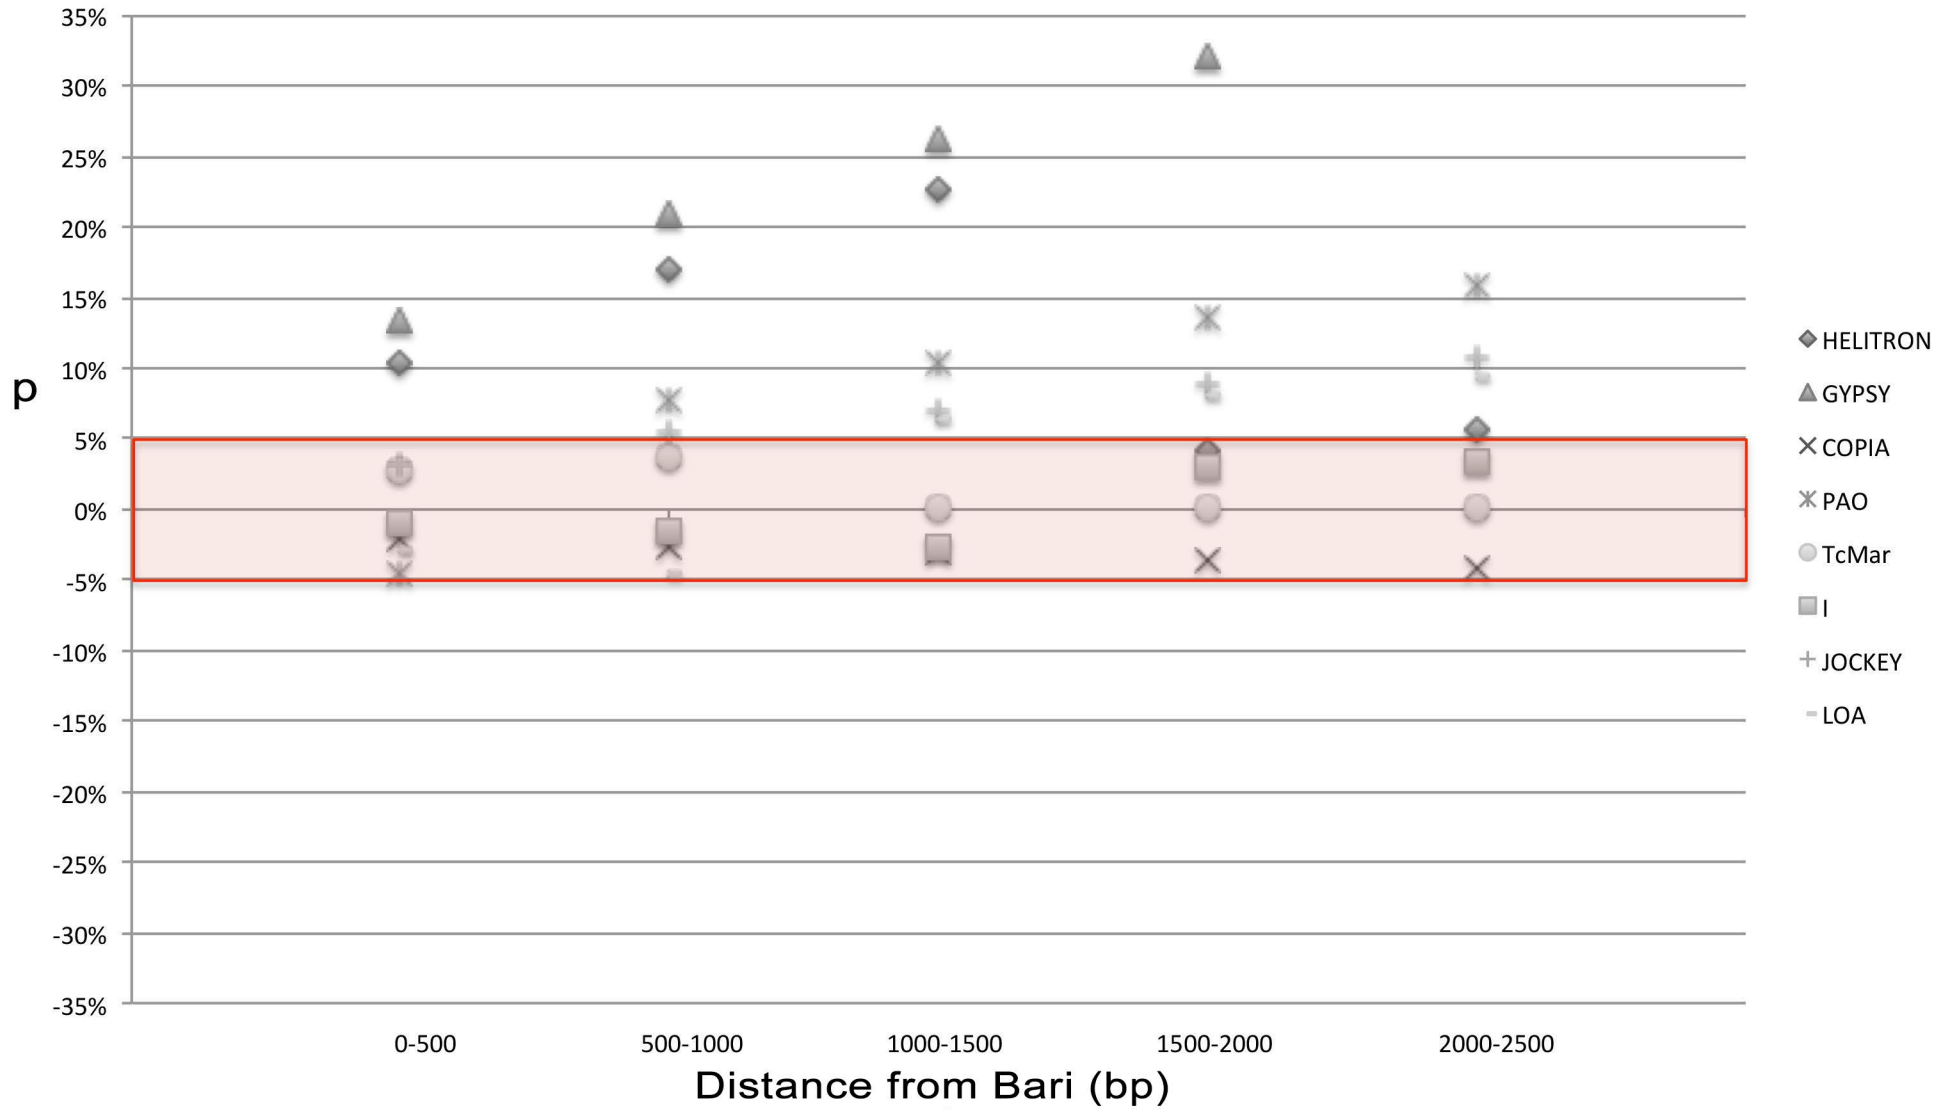

# D. melanogaster

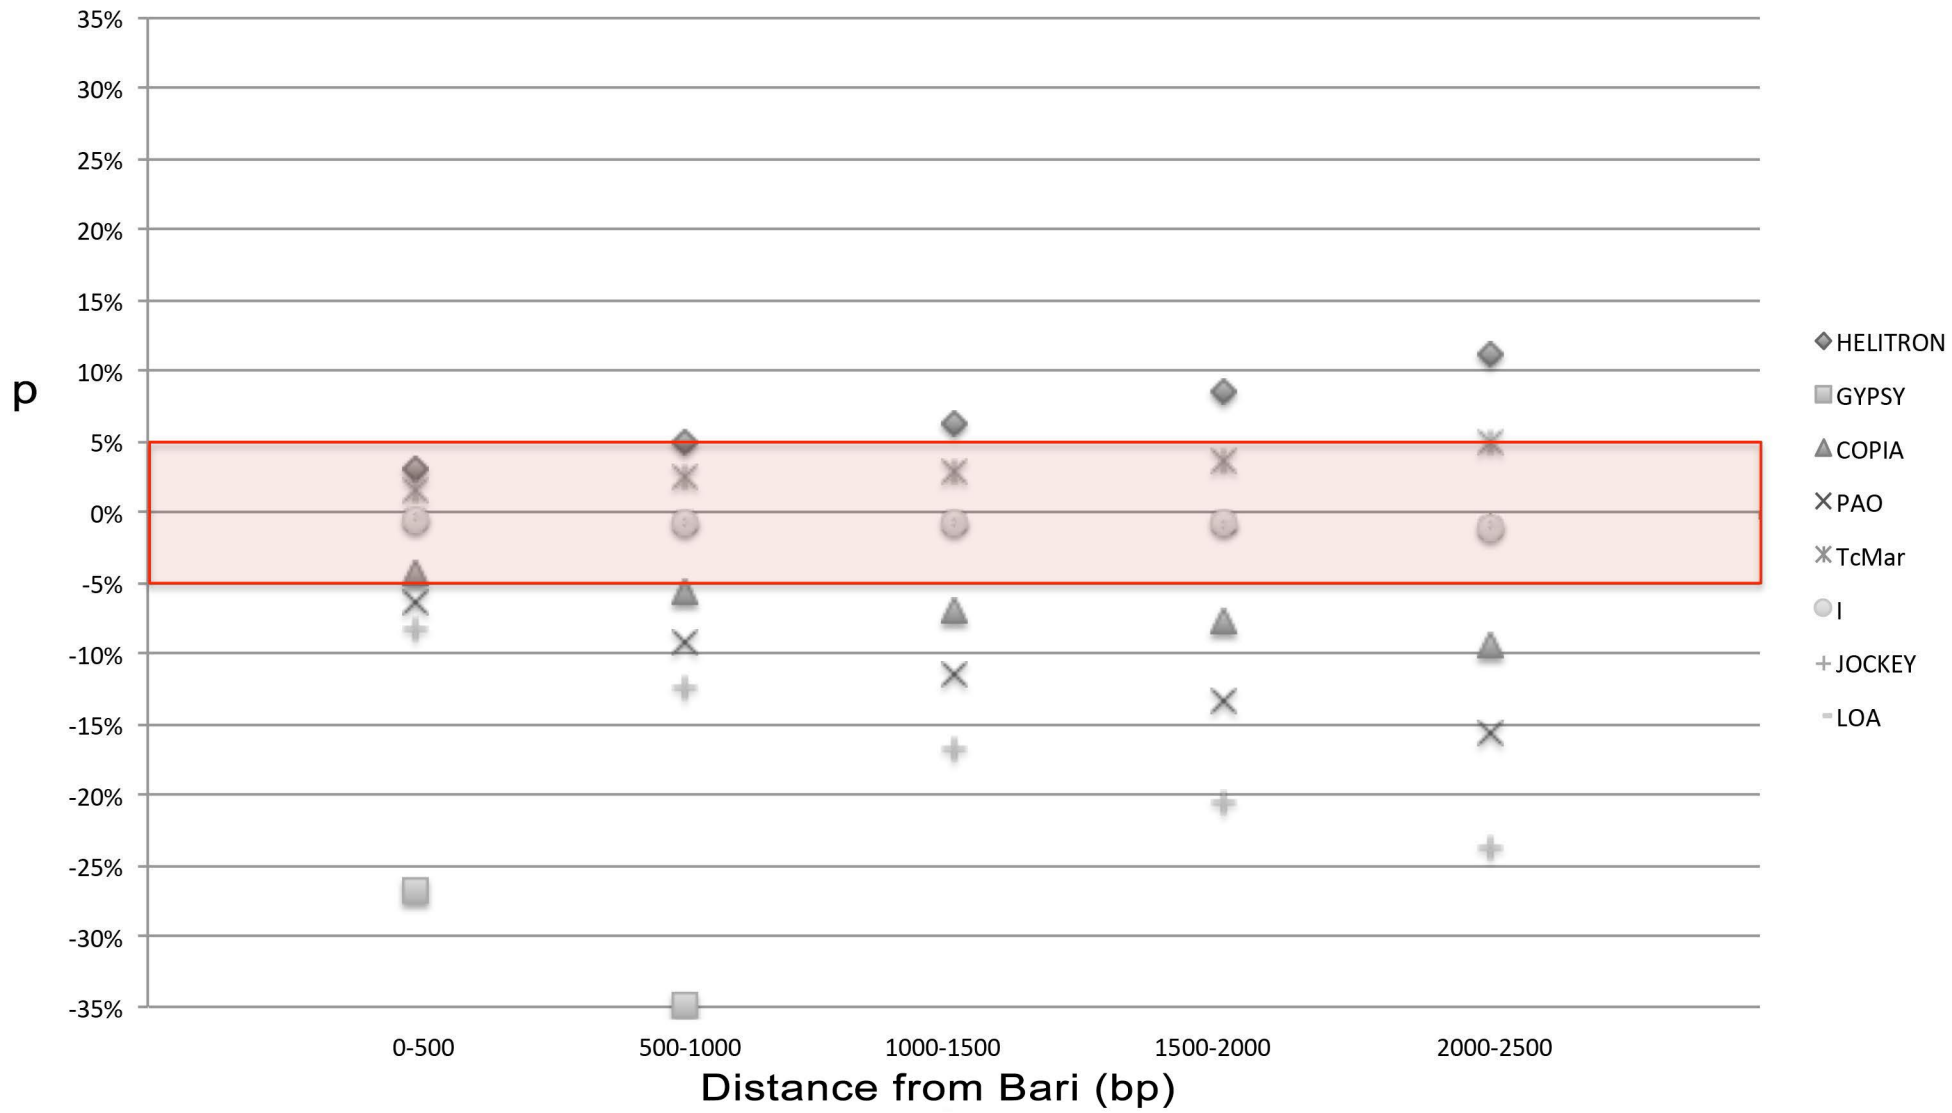

# D. miranda

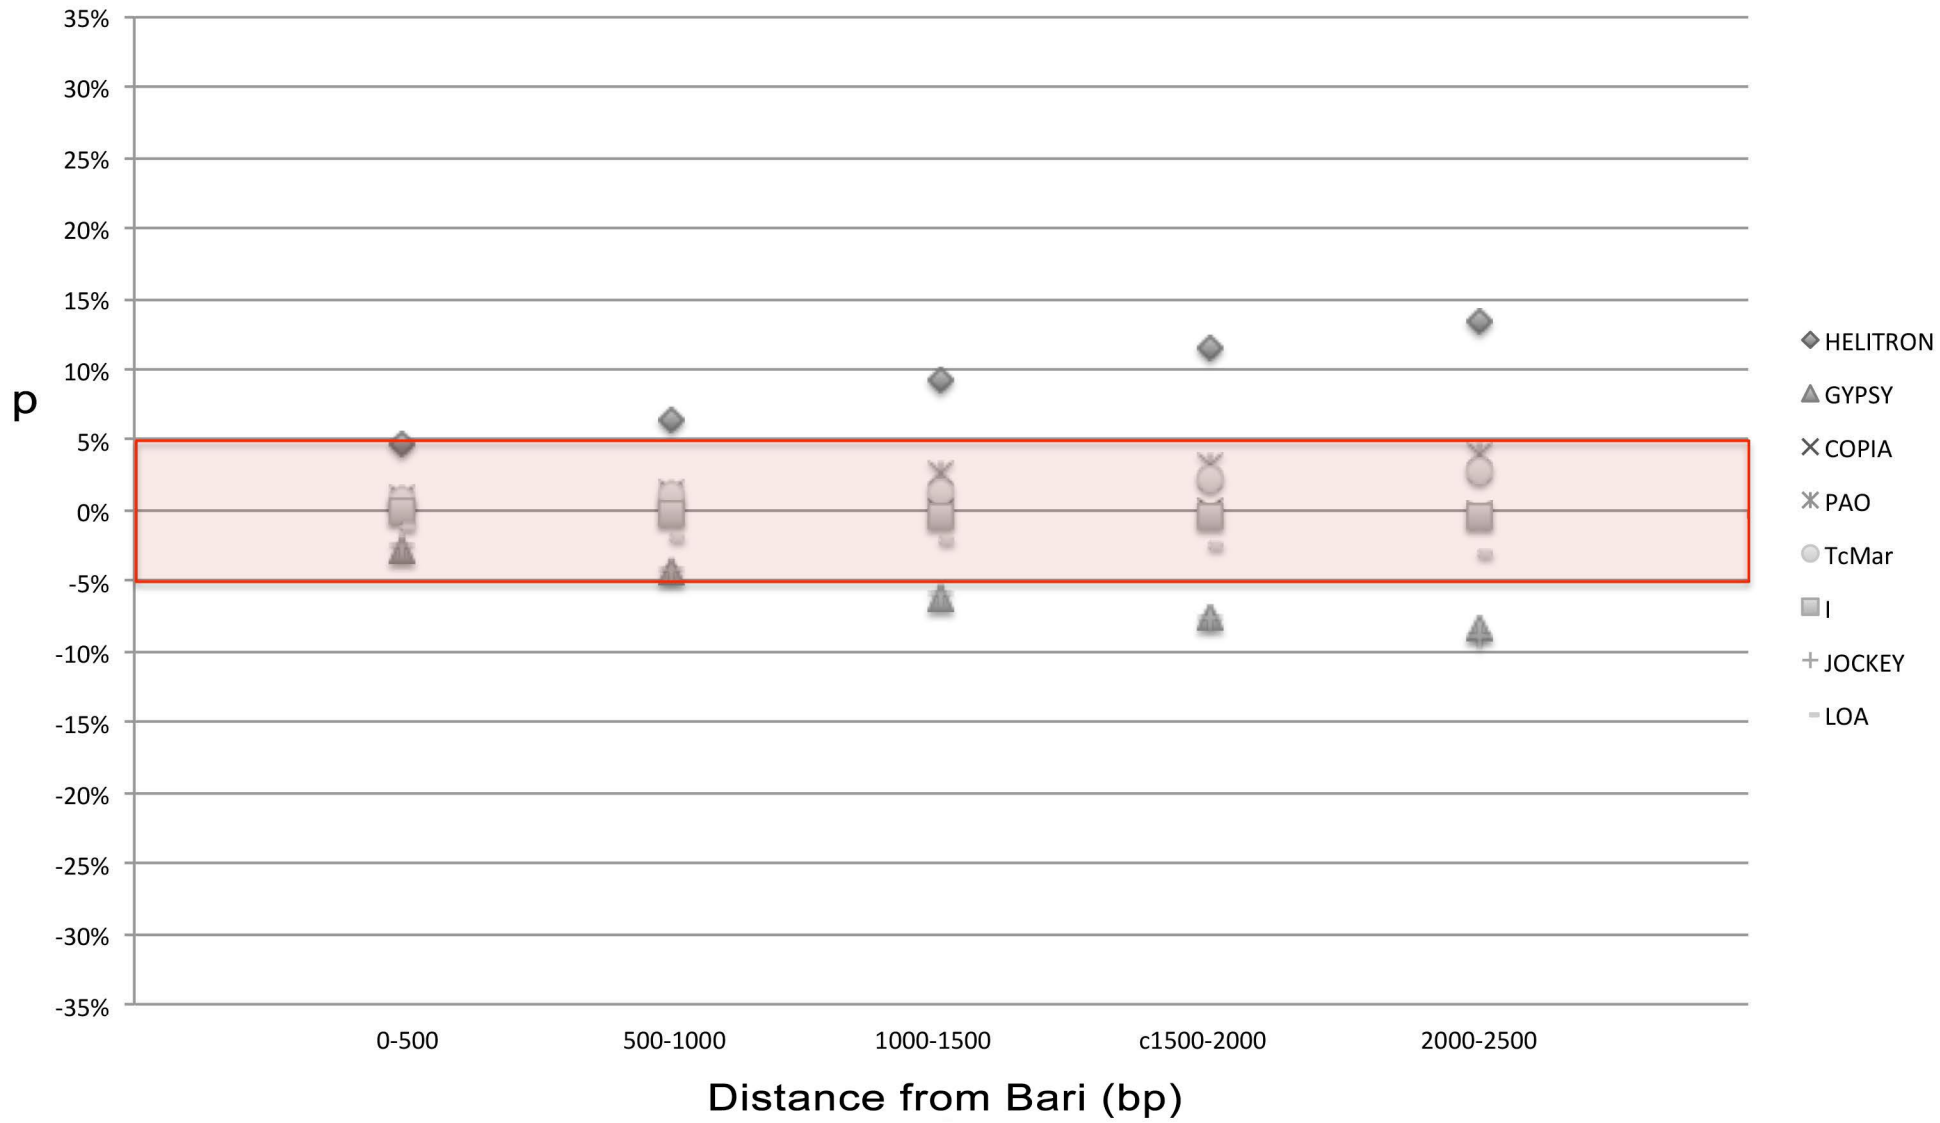

# D. mojavensis

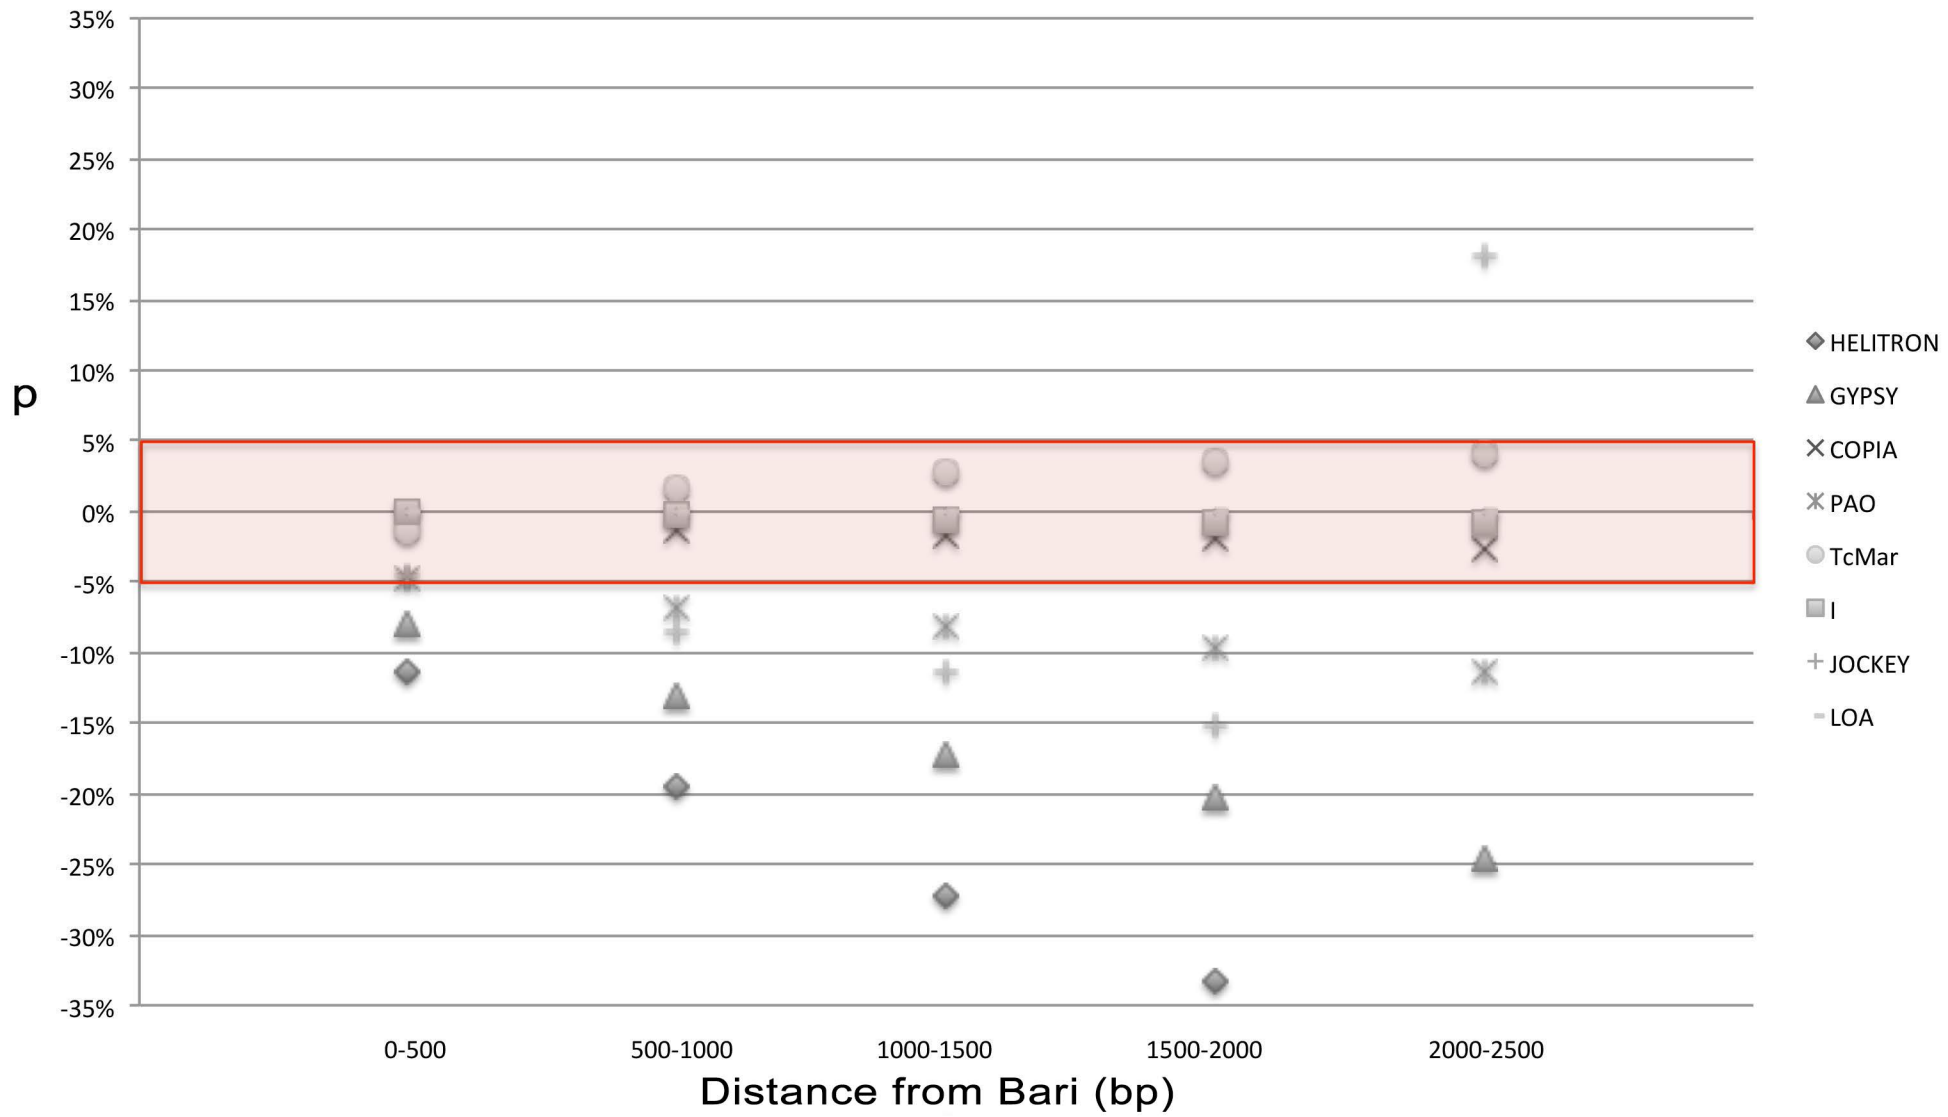

# D. persimilis

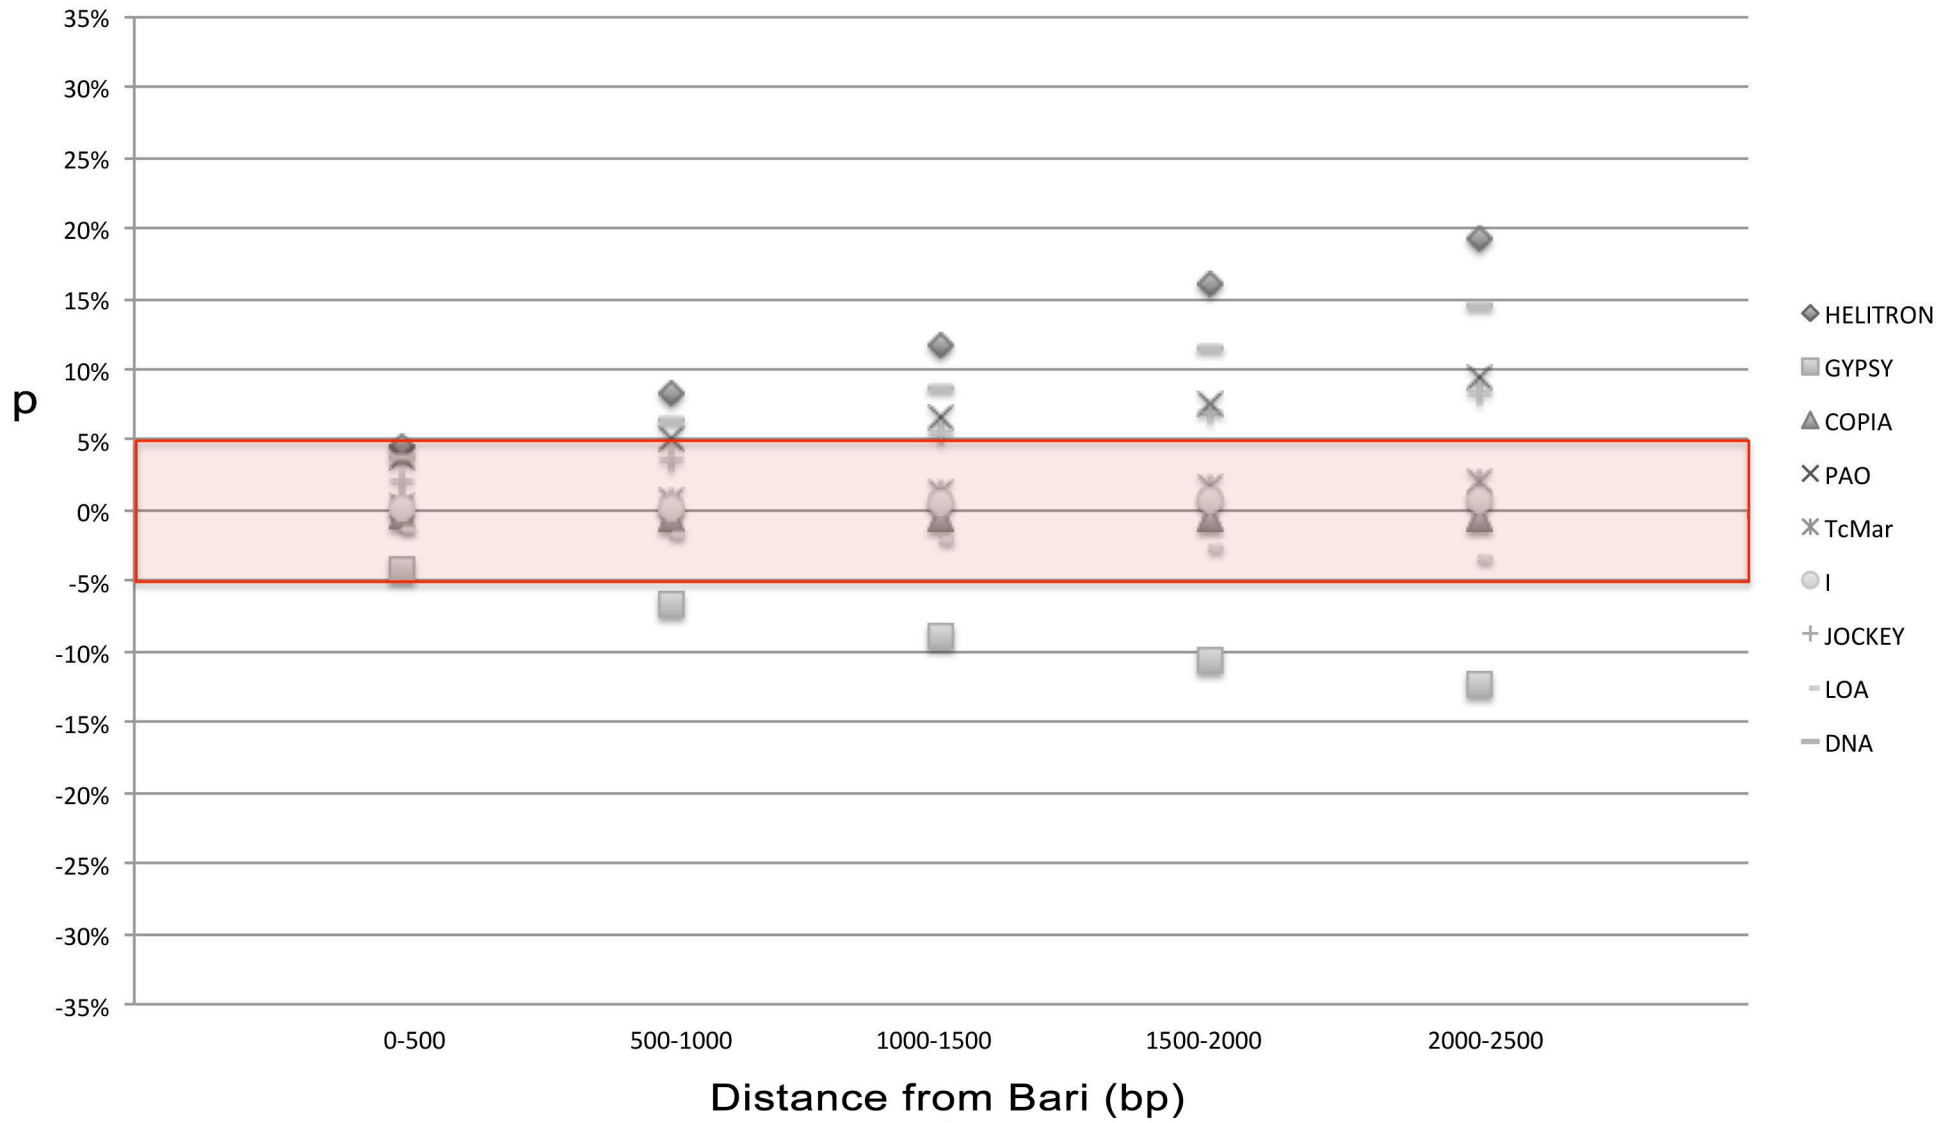



# D. pseudoobscura

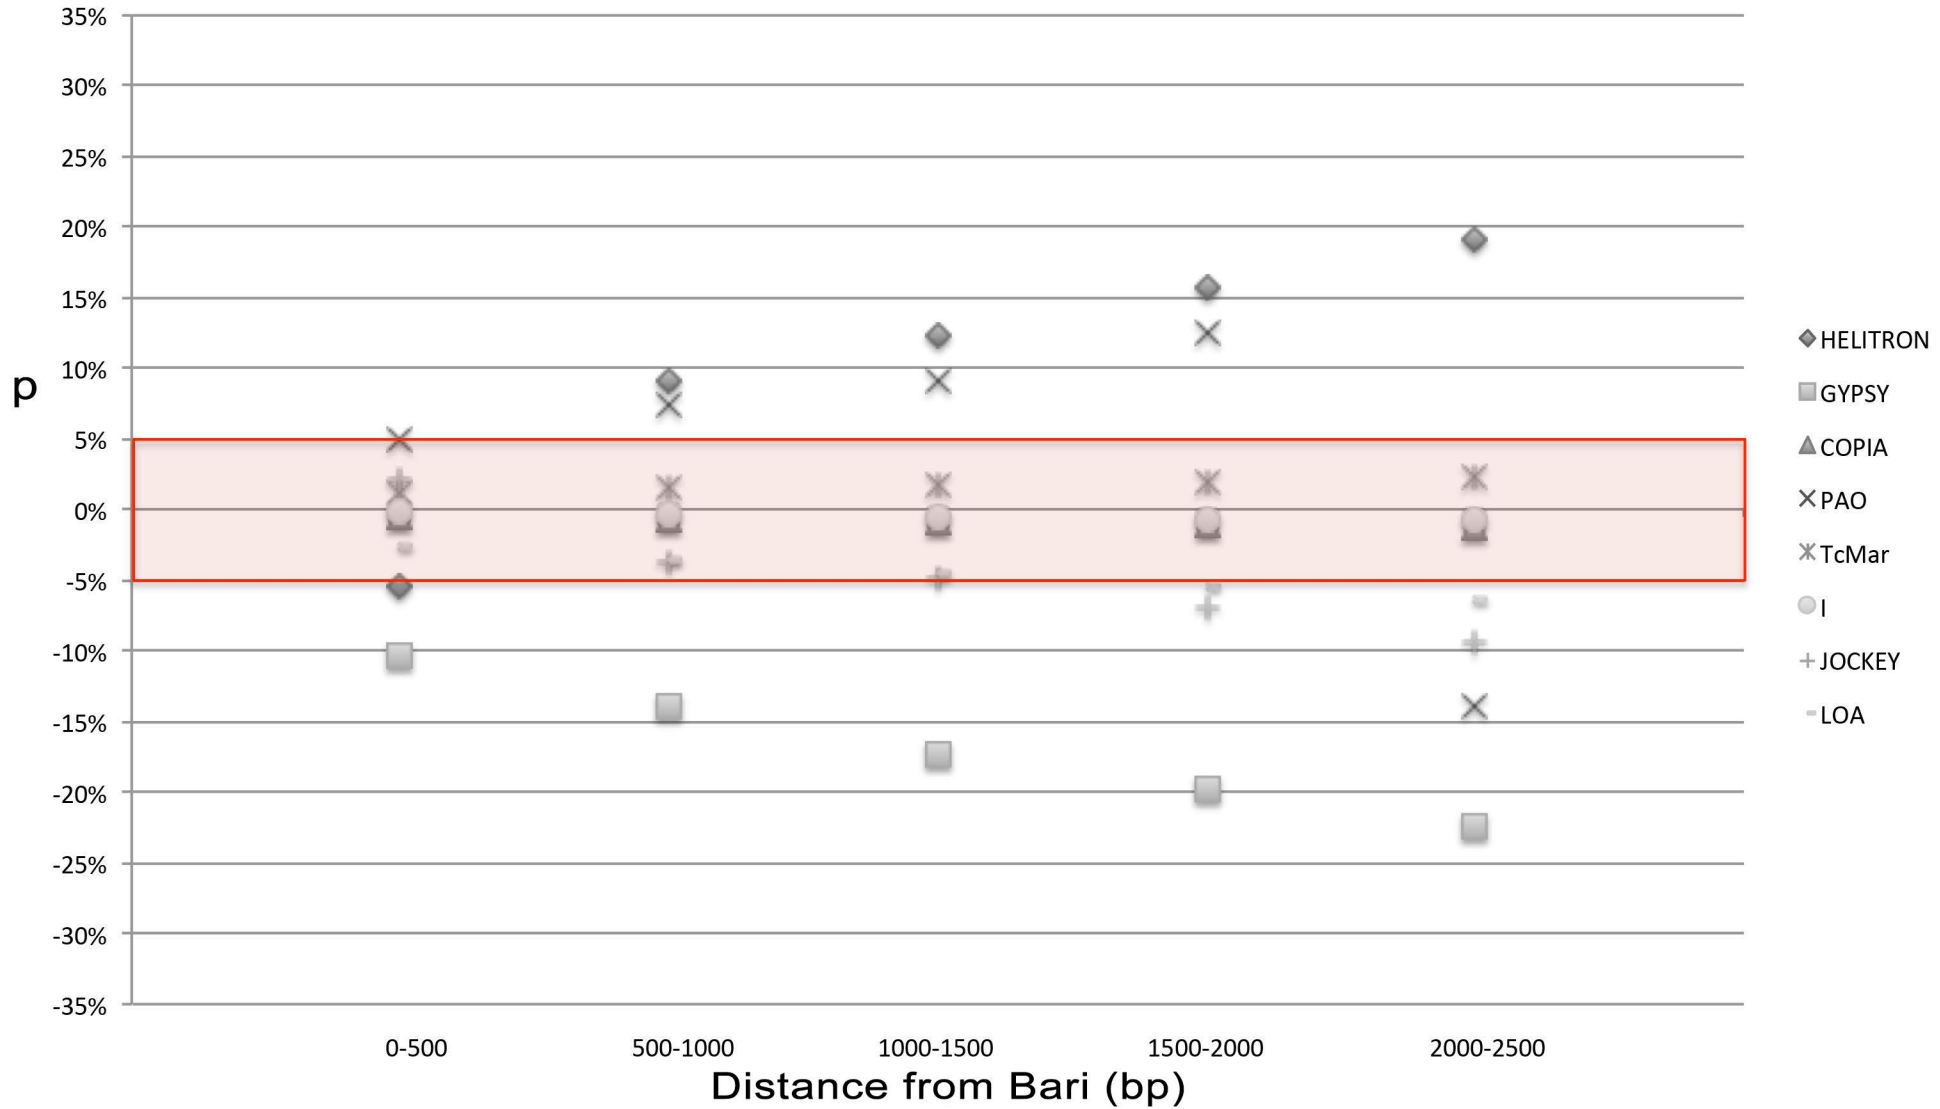

# D. rhopaloa

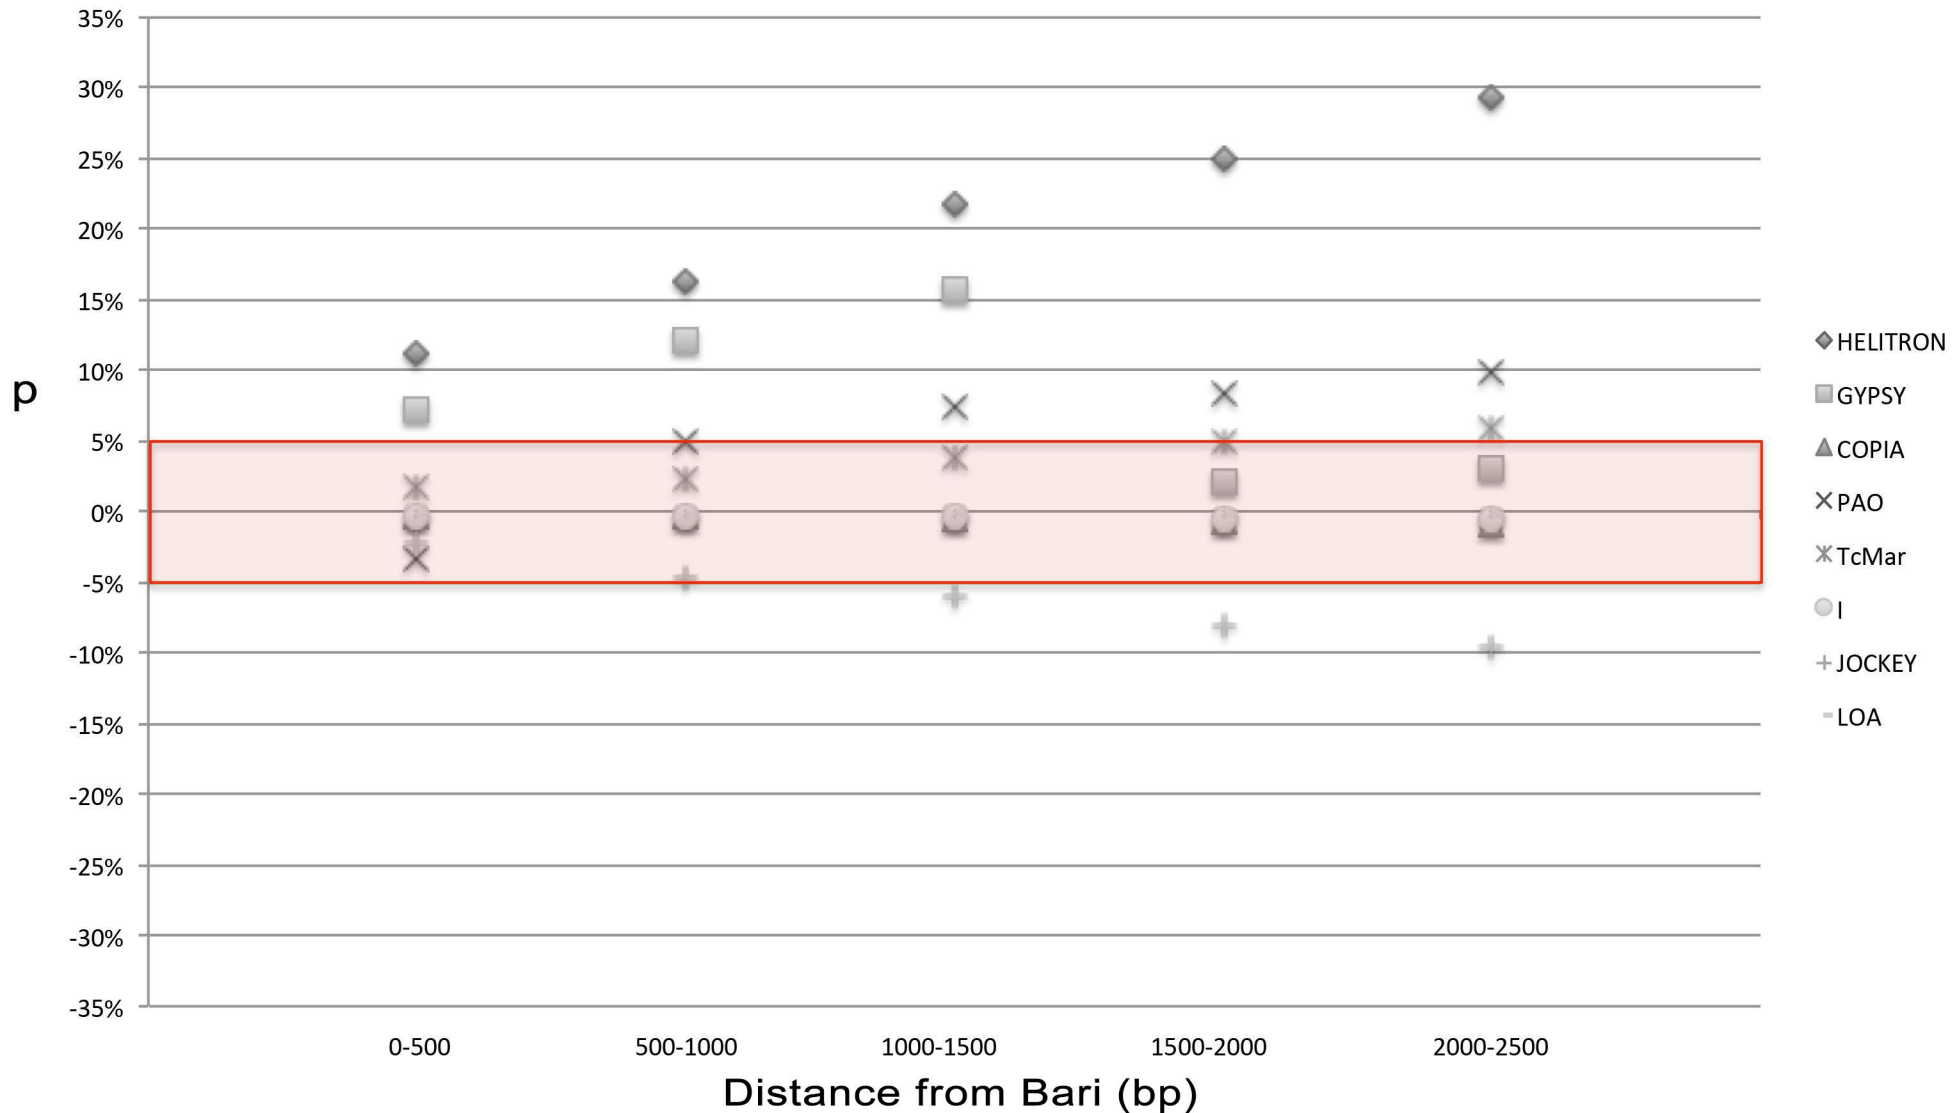

# D. sechellia

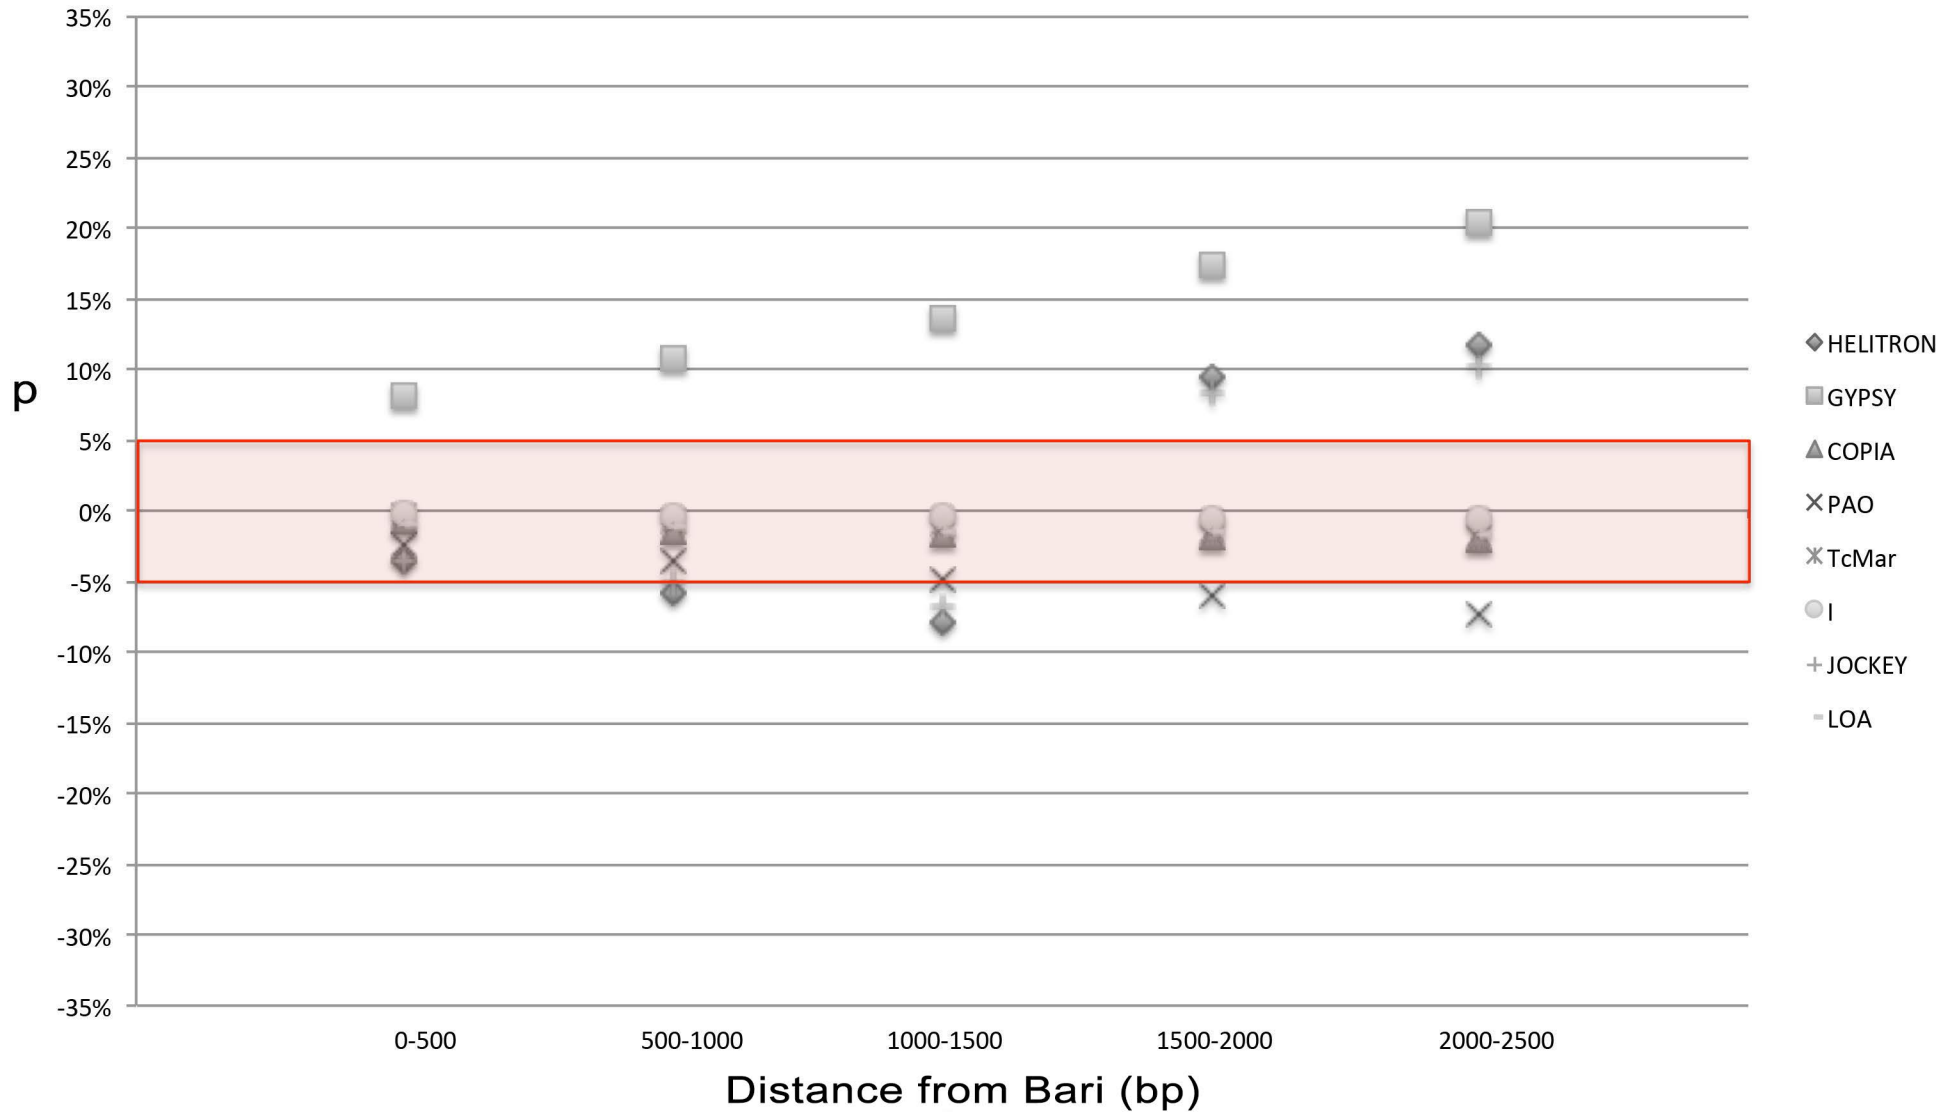

# D. simulans

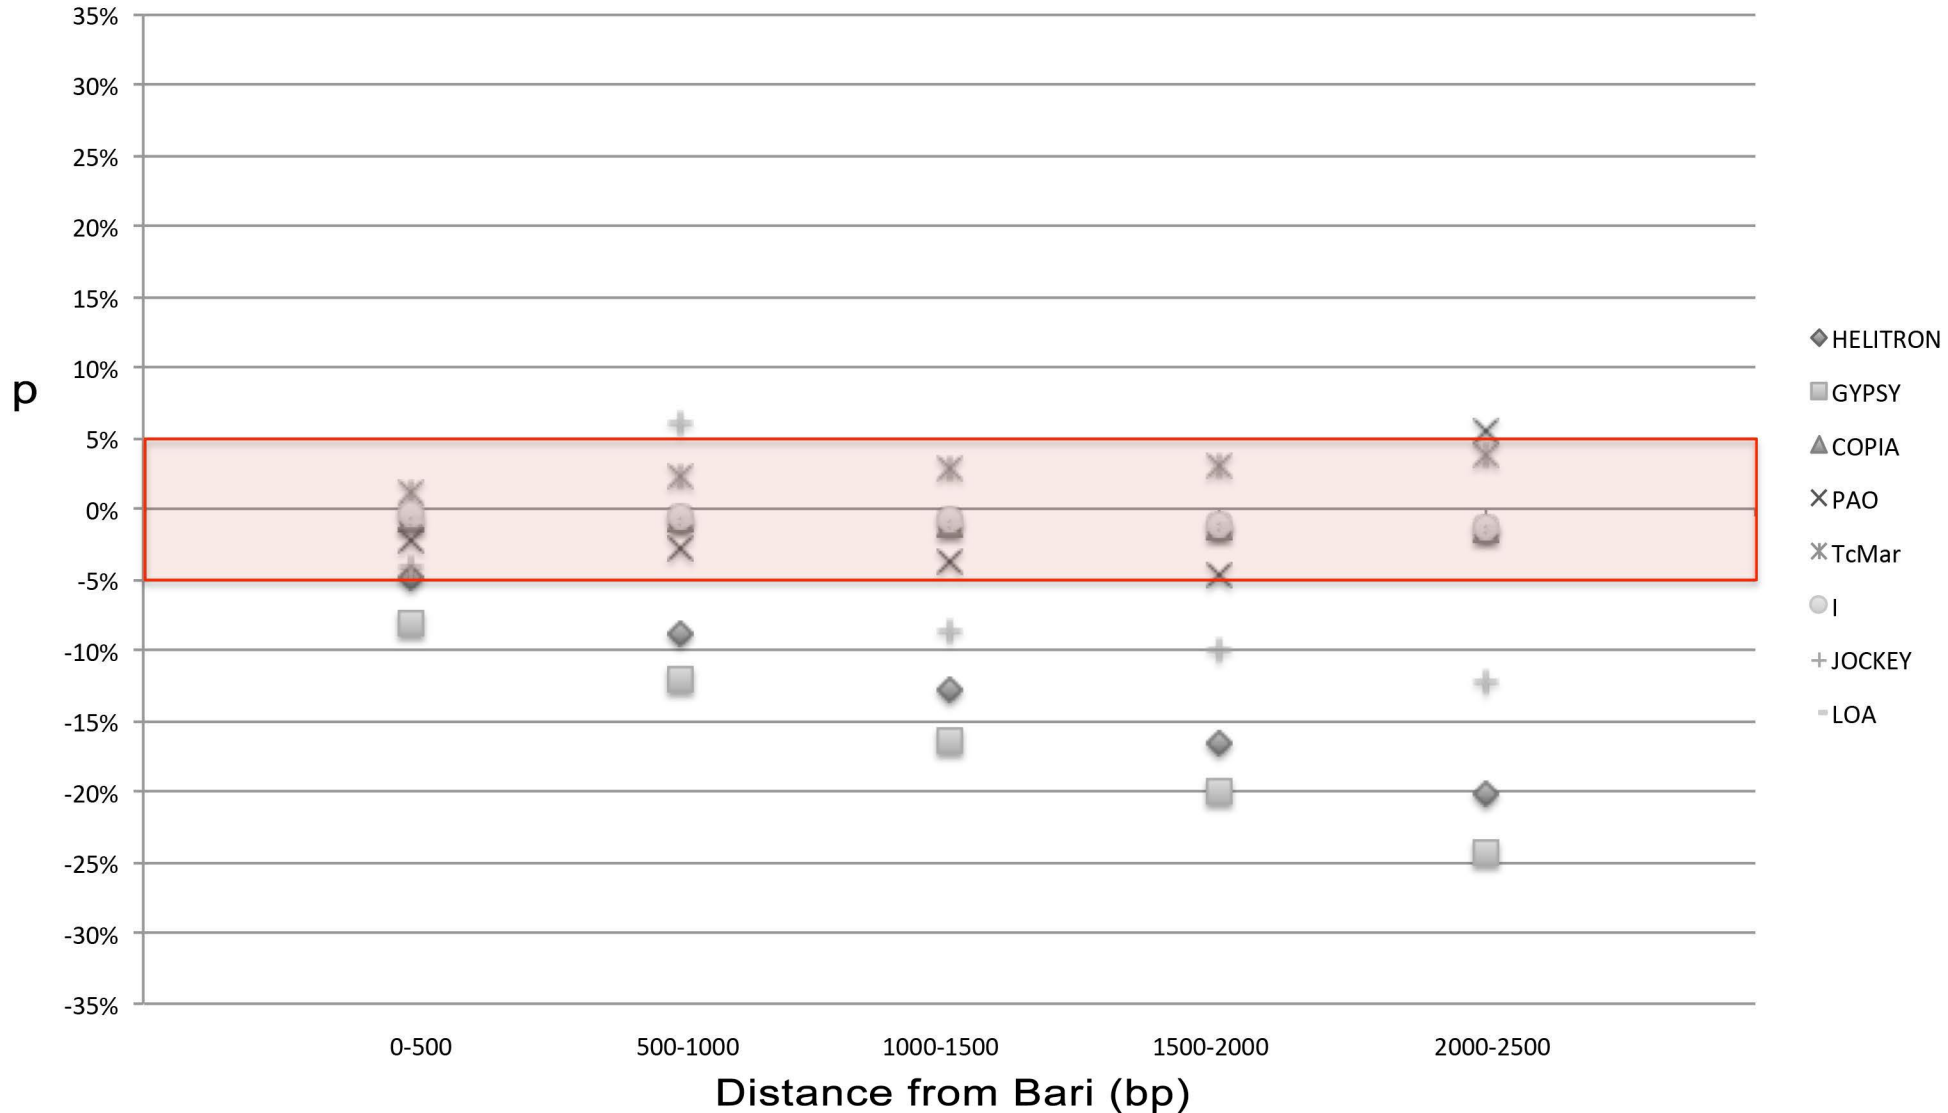

# D. suzukii

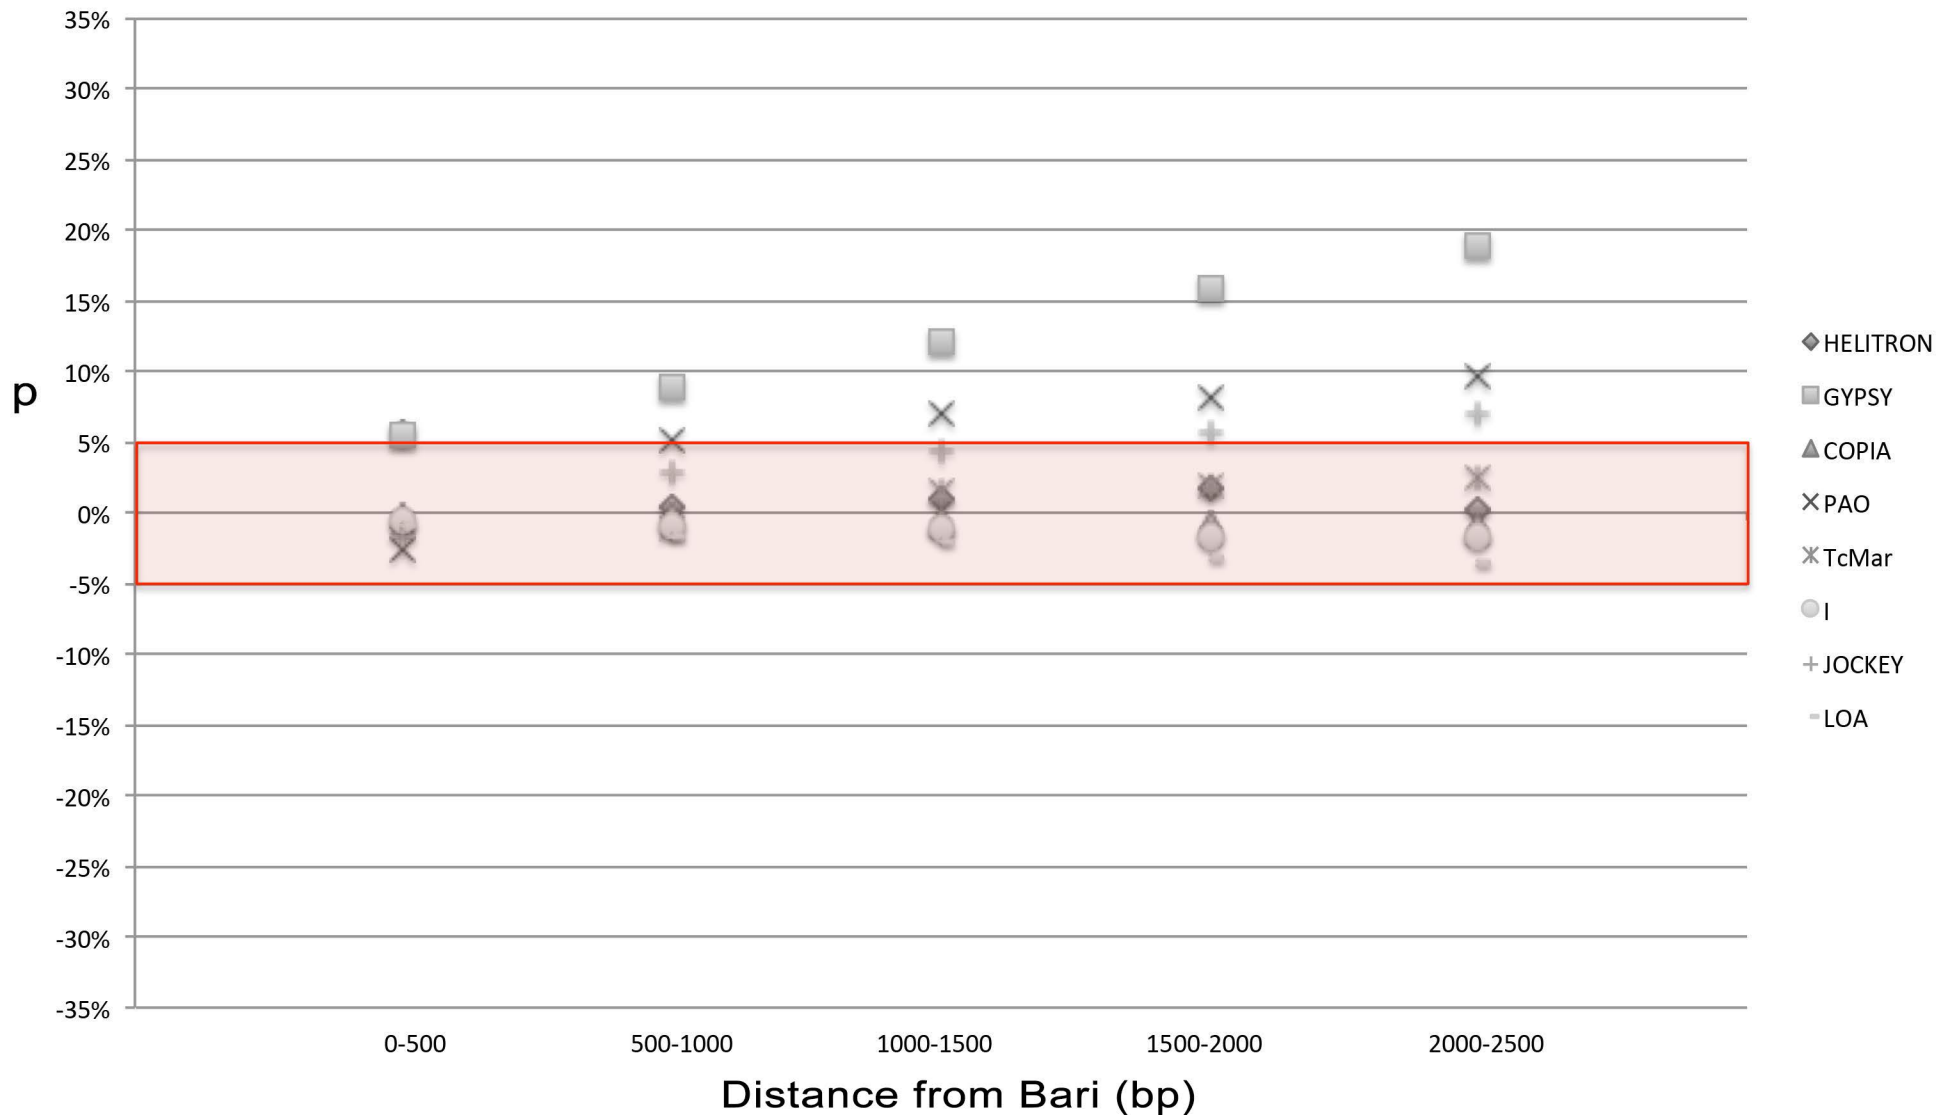

# D. virilis

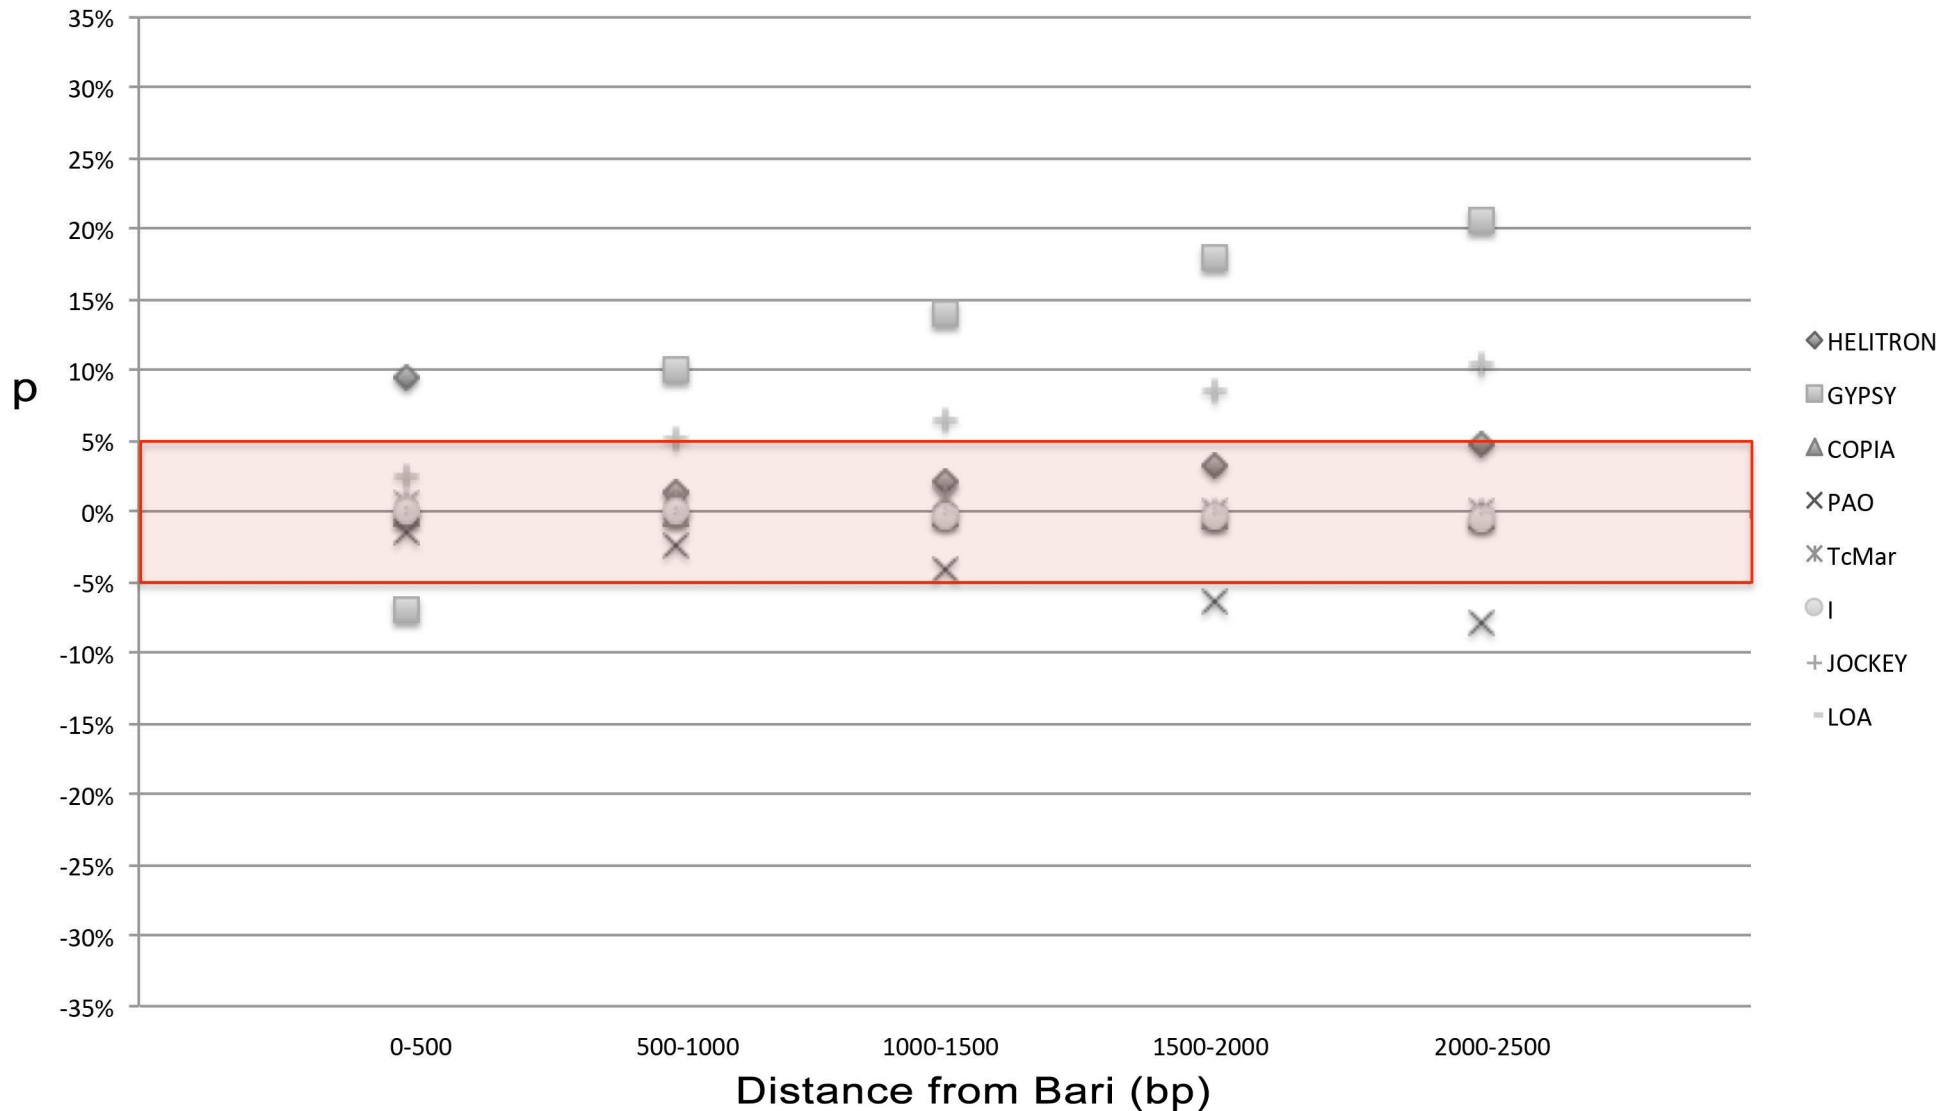

# D. willistoni

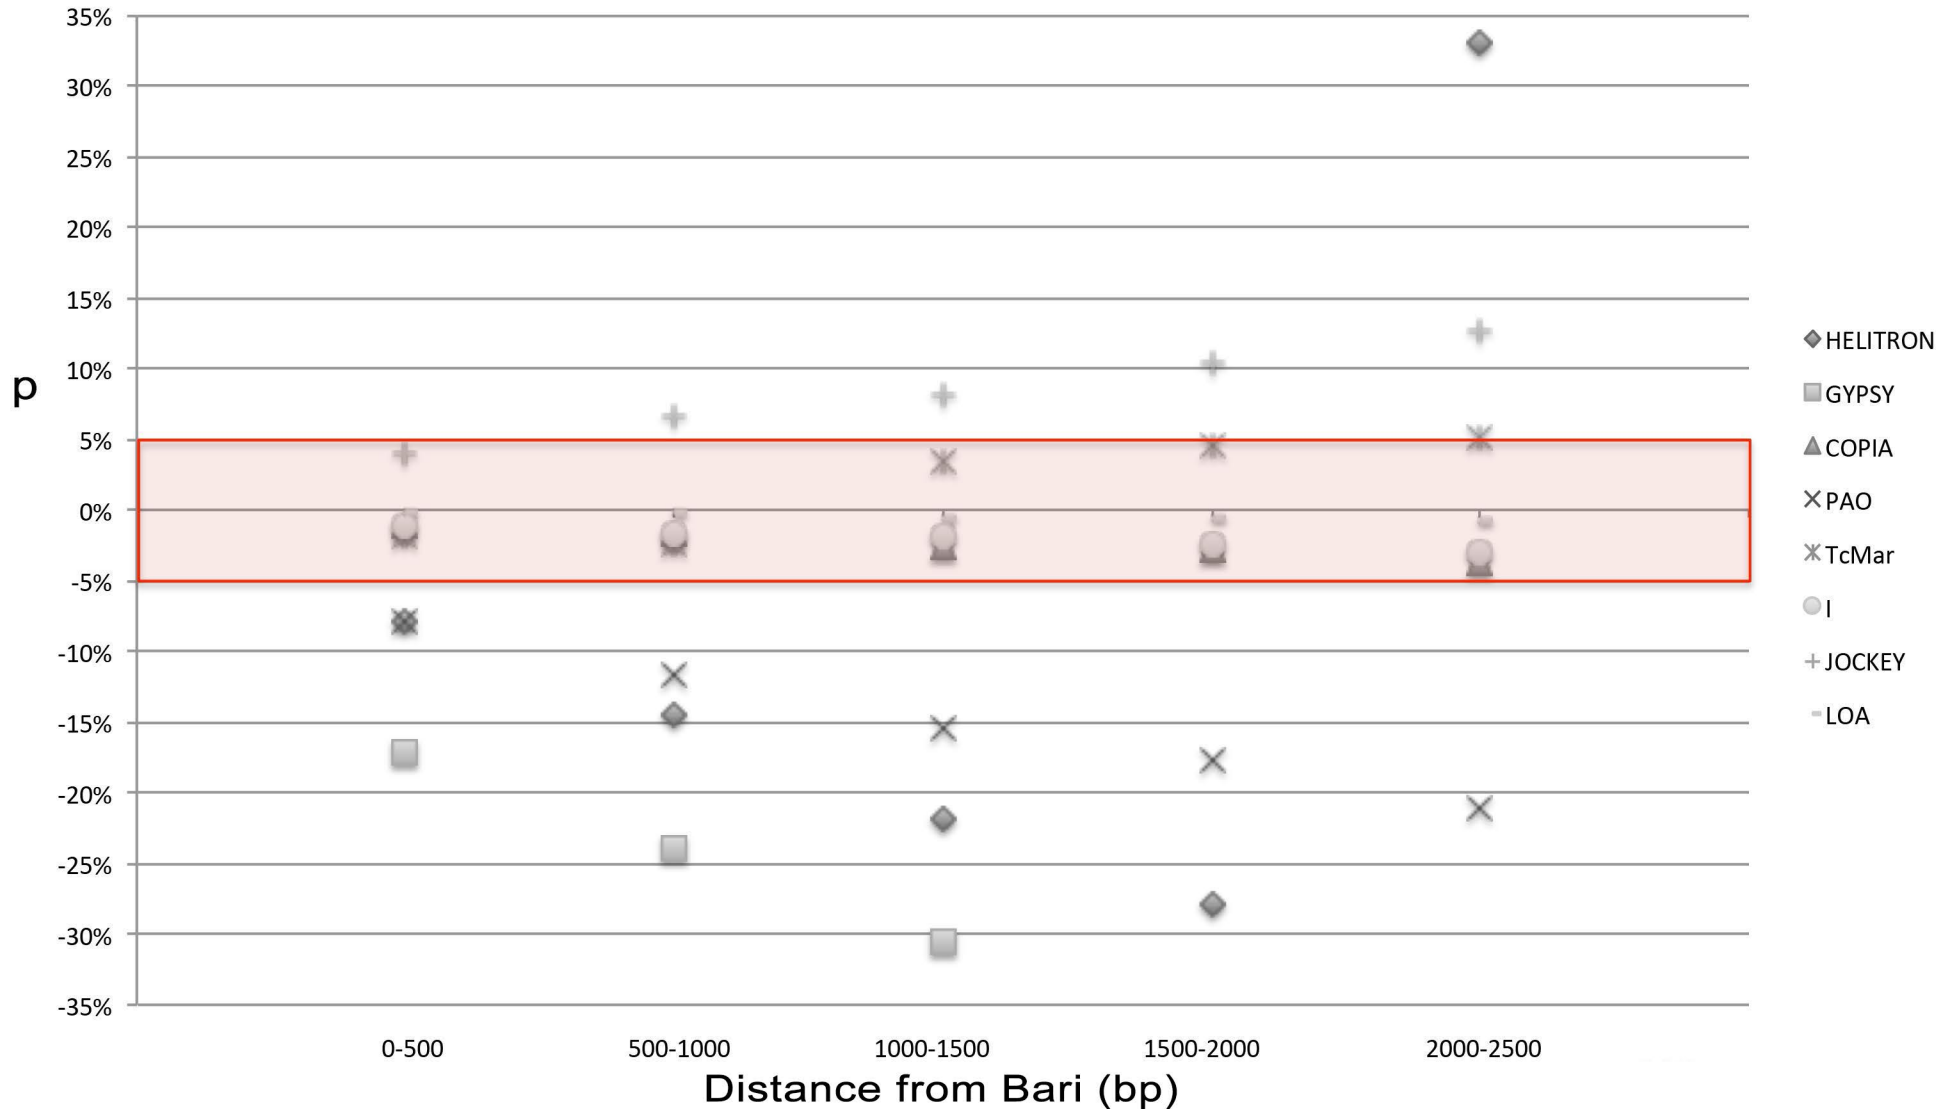

Supplement: pone.0156014.s005.pdf [file pone.0156014.s005.pdf]
