# Supplementary material for: Identification of Bari Transposons in 23 Sequenced Drosophila Genomes Reveals Novel Structural Variants, MITEs and Horizontal Transfer
Source: PubMed Central journal article supplement (PMC4877112; doi:10.1371/journal.pone.0156014), 2016-05-23
Supplement: pone.0156014.s003.pdf [file pone.0156014.s003.pdf]

1 10 20 30 40 50 60 70 80 90 100 110 120 130
Bari\_Dtak\_MITE CAGGGGTTGGTCAAAAGTATTTCACAACTTACACGACTACTACTCATAGAAA
Bari\_Drho\_MITE CAGGGGTTGGTCAAAAGTATTTCACAACTTTCATATGAGTAACTACTGTAATT
Bari\_Delet\_MITE CAGGGGTTGGTCAAAAGTATTTCACAACTTTCATATGAGTAACTACTGTAATT
msechBari2 CAGGGGTTGGTCAAAAGTATTTCACAACTTTCATATGAGTAACTACTGTAATT
msechBari1 CAGGGGTTGGTCAAAAGTATTTCACAACTTTCATATGAGTAACTACTGTAATT
Bari\_Dsim\_MITE CAGGGGTTGGTCAAAAGTATTTCACAACTTTCATATGAGTAACTACTGTAATT
Bari\_Dsuz\_MITE CAGGGGTTGGTCAAAAGTATTTCACAACTTTCATATGAGTAACTACTGTAATT
Bari\_Dfic\_MITE CAGGGGTTGGTCAAAAGTATTTCACAACTTTCATATGAGTAACTACTGTAATT
Bari\_Dmel\_MITE-2 CAGGGGTTGGTCAAAAGTATTTCACAACTTTCATATGAGTAACTACTGTAATT
Bari1 CAGGGGTTGGTCAAAAGTATTTCACAACTTTCATATGAGTAACTACTGTAATT
Bari3 CAGGGGTTGGTCAAAAGTATTTCACAACTTTCATATGAGTAACTACTGTAATT
Bari2 CAGGGGTTGGTCAAAAGTATTTCACAACTTTCATATGAGTAACTACTGTAATT
Bari\_Dyak\_MITE CAGGGGTTGGTCAAAAGTATTTCACAACTTTCATATGAGTAACTACTGTAATT
Bari\_Dmel\_MITE-1 CAGGGGTTGGTCAAAAGTATTTCACAACTTTCATATGAGTAACTACTGTAATT
consensus CAGGGGTTGGTCAAAAGTATTTCACAACTTTCATATGAGTAACTACTGTAATT
131 140 150 160 170 180 190 200 210 220 230 240 250 260
Bari\_Dtak\_MITE
Bari\_Drho\_MITE
Bari\_Delet\_MITE
msechBari2
msechBari1
Bari\_Dsim\_MITE
Bari\_Dsuz\_MITE
Bari\_Dfic\_MITE
Bari\_Dmel\_MITE-2
Bari1
Bari3
Bari2
Bari\_Dyak\_MITE
Bari\_Dmel\_MITE-1
consensus
261 270 280 290 300 310 320 330 340 350 360 370 380 390
Bari\_Dtak\_MITE
Bari\_Drho\_MITE
Bari\_Delet\_MITE
msechBari2
msechBari1
Bari\_Dsim\_MITE
Bari\_Dsuz\_MITE
Bari\_Dfic\_MITE
Bari\_Dmel\_MITE-2
Bari1
Bari3
Bari2
Bari\_Dyak\_MITE
Bari\_Dmel\_MITE-1
consensus
391 400 410 420 430 440 450 460 470 480 490 500 510 520
Bari\_Dtak\_MITE
Bari\_Drho\_MITE
Bari\_Delet\_MITE
msechBari2
msechBari1
Bari\_Dsim\_MITE
Bari\_Dsuz\_MITE
Bari\_Dfic\_MITE
Bari\_Dmel\_MITE-2
Bari1
Bari3
Bari2
Bari\_Dyak\_MITE
Bari\_Dmel\_MITE-1
consensus
521 530 540 550 560 570 580 590 600 610 620 630 640 650
Bari\_Dtak\_MITE
Bari\_Drho\_MITE
Bari\_Delet\_MITE
msechBari2
msechBari1
Bari\_Dsim\_MITE
Bari\_Dsuz\_MITE
Bari\_Dfic\_MITE
Bari\_Dmel\_MITE-2
Bari1
Bari3
Bari2
Bari\_Dyak\_MITE
Bari\_Dmel\_MITE-1
consensus
651 660 670 680 690 700 710 720 730 740 750 760 770 780
Bari\_Dtak\_MITE
Bari\_Drho\_MITE
Bari\_Delet\_MITE
msechBari2
msechBari1
Bari\_Dsim\_MITE
Bari\_Dsuz\_MITE
Bari\_Dfic\_MITE
Bari\_Dmel\_MITE-2
Bari1
Bari3
Bari2
Bari\_Dyak\_MITE
Bari\_Dmel\_MITE-1
consensus
781 790 800 810 820 830 840 850 860 870 880 890 900 910
Bari\_Dtak\_MITE
Bari\_Drho\_MITE
Bari\_Delet\_MITE
msechBari2
msechBari1
Bari\_Dsim\_MITE
Bari\_Dsuz\_MITE
Bari\_Dfic\_MITE
Bari\_Dmel\_MITE-2
Bari1
Bari3
Bari2
Bari\_Dyak\_MITE
Bari\_Dmel\_MITE-1
consensus
911 920 930 940 950 960 970 980 990 1000 1010 1020 1030 1040
Bari\_Dtak\_MITE
Bari\_Drho\_MITE
Bari\_Delet\_MITE
msechBari2
msechBari1
Bari\_Dsim\_MITE
Bari\_Dsuz\_MITE
Bari\_Dfic\_MITE
Bari\_Dmel\_MITE-2
Bari1
Bari3
Bari2
Bari\_Dyak\_MITE
Bari\_Dmel\_MITE-1
consensus
1041 1050 1060 1070 1080 1090 1100 1110 1120 1130 1140 1150 1160 1170
Bari\_Dtak\_MITE
Bari\_Drho\_MITE
Bari\_Delet\_MITE
msechBari2
msechBari1
Bari\_Dsim\_MITE
Bari\_Dsuz\_MITE
Bari\_Dfic\_MITE
Bari\_Dmel\_MITE-2
Bari1
Bari3
Bari2
Bari\_Dyak\_MITE
Bari\_Dmel\_MITE-1
consensus
1171 1180 1190 1200 1210 1220 1230 1240 1250 1260 1270 1280 1290 1300
Bari\_Dtak\_MITE
Bari\_Drho\_MITE
Bari\_Delet\_MITE
msechBari2
msechBari1
Bari\_Dsim\_MITE
Bari\_Dsuz\_MITE
Bari\_Dfic\_MITE
Bari\_Dmel\_MITE-2
Bari1
Bari3
Bari2
Bari\_Dyak\_MITE
Bari\_Dmel\_MITE-1
consensus
1301 1310 1320 1330 1340 1350 1360 1370 1380 1390 1400 1410 1420 1430
Bari\_Dtak\_MITE
Bari\_Drho\_MITE
Bari\_Delet\_MITE
msechBari2
msechBari1
Bari\_Dsim\_MITE
Bari\_Dsuz\_MITE
Bari\_Dfic\_MITE
Bari\_Dmel\_MITE-2
Bari1
Bari3
Bari2
Bari\_Dyak\_MITE
Bari\_Dmel\_MITE-1
consensus
1431 1440 1450 1460 1470 1480 1490 1500 1510 1520 1530 1540 1550 1560
Bari\_Dtak\_MITE
Bari\_Drho\_MITE
Bari\_Delet\_MITE
msechBari2
msechBari1
Bari\_Dsim\_MITE
Bari\_Dsuz\_MITE
Bari\_Dfic\_MITE
Bari\_Dmel\_MITE-2
Bari1
Bari3
Bari2
Bari\_Dyak\_MITE
Bari\_Dmel\_MITE-1
consensus
1561 1570 1580 1590 1600 1610 1620 1630 1640 1650 1660 1670 1680 1690
Bari\_Dtak\_MITE
Bari\_Drho\_MITE
Bari\_Delet\_MITE
msechBari2
msechBari1
Bari\_Dsim\_MITE
Bari\_Dsuz\_MITE
Bari\_Dfic\_MITE
Bari\_Dmel\_MITE-2
Bari1
Bari3
Bari2
Bari\_Dyak\_MITE
Bari\_Dmel\_MITE-1
consensus
1691 1700 1710 1720 1730 1740 1750 1760 1770 1781
Bari\_Dtak\_MITE
Bari\_Drho\_MITE
Bari\_Delet\_MITE
msechBari2
msechBari1
Bari\_Dsim\_MITE
Bari\_Dsuz\_MITE
Bari\_Dfic\_MITE
Bari\_Dmel\_MITE-2
Bari1
Bari3
Bari2
Bari\_Dyak\_MITE
Bari\_Dmel\_MITE-1
consensus
