# Supplementary material for: Identification of Bari Transposons in 23 Sequenced Drosophila Genomes Reveals Novel Structural Variants, MITEs and Horizontal Transfer
Source: PubMed Central journal article supplement (PMC4877112; doi:10.1371/journal.pone.0156014), 2016-05-23
Supplement: pone.0156014.s010.pdf [file pone.0156014.s010.pdf]

| INTER-SPECIES ANALYSIS (Figure 3A) |                     |            |  |
|------------------------------------|---------------------|------------|--|
| Subfamily                          | Kruskal-Wallis test | TUKEY TEST |  |
| Bari1                              | p=0,203227355       | NA         |  |
| Bari2                              | p=0,129527813       | NA         |  |
| Bari3                              | p=0,330090937       | NA         |  |

| INTRA-SPECIES ANALYSIS (Figure 3B, 3C, 3D; supplemental figure 1) |                     |               |                 |
|-------------------------------------------------------------------|---------------------|---------------|-----------------|
| Species                                                           | Kruskal-Wallis test | TUKEY TEST    |                 |
| <b>D. ananassae</b>                                               | p=0,00789941        | LEFT vs CDS   | * p<0.05        |
|                                                                   |                     | LEFT vs RIGHT | ** p<0.01       |
|                                                                   |                     | CDS vs RIGHT  | Not significant |
| <b>D. miranda</b>                                                 | p=0,000598          | LEFT vs CDS   | * p<0.05        |
|                                                                   |                     | LEFT vs RIGHT | ** p<0.01       |
|                                                                   |                     | CDS vs RIGHT  | Not significant |
| <b>D. pseudoobscura</b>                                           | p=0,012510843       | LEFT vs CDS   | * p<0.05        |
|                                                                   |                     | LEFT vs RIGHT | Not significant |
|                                                                   |                     | CDS vs RIGHT  | Not significant |
| <b>D. simulans</b>                                                | p=2,0873E-05        | LEFT vs CDS   | ** p<0.01       |
|                                                                   |                     | LEFT vs RIGHT | ** p<0.01       |
|                                                                   |                     | CDS vs RIGHT  | * p<0.05        |
| <b>D. willistoni</b>                                              | p=0,000572994       | LEFT vs CDS   | ** p<0.01       |
|                                                                   |                     | LEFT vs RIGHT | Not significant |
|                                                                   |                     | CDS vs RIGHT  | ** p<0.01       |
| <b>D. erecta</b>                                                  | p=3,44437E-22       | LEFT vs CDS   | Not significant |
|                                                                   |                     | LEFT vs RIGHT | ** p<0.01       |
|                                                                   |                     | CDS vs RIGHT  | ** p<0.01       |

|                        |               |  |    |  |
|------------------------|---------------|--|----|--|
|                        |               |  |    |  |
|                        |               |  |    |  |
| <b>D. persimilis</b>   | p=0,02361038  |  | NA |  |
|                        |               |  |    |  |
|                        |               |  |    |  |
| <b>D. melanogaster</b> | p=0,74237073  |  | NA |  |
|                        |               |  |    |  |
|                        |               |  |    |  |
| <b>D. mojavensis</b>   | p=0,055702142 |  | NA |  |
